# Supplementary material for: Crosstalk Between Polygonatum kingianum, the miRNA, and Gut Microbiota in the Regulation of Lipid Metabolism
Source: PubMed Central journal article supplement (PMC8578870; doi:10.3389/fphar.2021.740528), 2021-10-27

## *Supplementary Material*

### 1 Supplementary Figures and Tables

#### 1.1 Supplementary Tables

**Supplementary Table 1.** Differentially expressed miRNA qRT-PCR verified miRNA and primer sequences

| Primer Name             | Sequence(5'-3')        |
|-------------------------|------------------------|
| rno-miR-19a-3p Forward  | GCGTGTGCAAATCTATGCAA   |
| rno-miR-19a-3p Reverse  | AGTGCAGGGTCCGAGGTATT   |
| rno-miR-21-3p Forward   | CGCAACAGCAGTCGATGG     |
| rno-miR-21-3p Reverse   | AGTGCAGGGTCCGAGGTATT   |
| rno-miR-122-5p Forward  | CGCGTGGAGTGTGACAATGG   |
| rno-miR-122-5p Reverse  | AGTGCAGGGTCCGAGGTATT   |
| rno-miR-142-3p Forward  | GCGCGTGTAGTGTTTCCTACTT |
| rno-miR-142-3p Reverse  | AGTGCAGGGTCCGAGGTATT   |
| rno-miR-184 Forward     | CGCGTGGACGGAGAACTGAT   |
| rno-miR-184 Reverse     | AGTGCAGGGTCCGAGGTATT   |
| rno-miR-200a-5p Forward | CGCGCATCTTACCGGACAG    |
| rno-miR-200a-5p Reverse | AGTGCAGGGTCCGAGGTATT   |
| rno-miR-378b Forward    | CGCGAGTGGACTTGGAGTC    |
| rno-miR-378b Reverse    | AGTGCAGGGTCCGAGGTATT   |
| rno-miR-451-5p Forward  | CGCGAAACCGTTACCATTAC   |
| rno-miR-451-5p Reverse  | AGTGCAGGGTCCGAGGTATT   |
| rno-miR-484 Forward     | GCGTCAGGCTCAGTCCCCT    |
| rno-miR-484 Reverse     | AGTGCAGGGTCCGAGGTATT   |
| rno-miR-1247-3p Forward | CGCGGGAACGTCGAGAC      |
| rno-miR-1247-3p Reverse | AGTGCAGGGTCCGAGGTATT   |
| rno-miR-3548 Forward    | CGCAGCACTGTCCGGTAA     |

|                     |                         |
|---------------------|-------------------------|
| mo-miR-3548 Reverse | AGTGCAGGGTCCGAGGTATT    |
| U6 Forward          | AGAGAAGATTAGCATGGCCCCTG |
| U6 Reverse          | AGTGCAGGGTCCGAGGTATT    |

**Supplementary Table 2.** Lipid-related biochemical indicators in rats' blood and liver samples (Mean  $\pm$  SD, n=7).

| Group | Serum TC        | Serum TG           | Serum HDL-C        | Serum LDL-C       | Liver TC          | Liver TG           |
|-------|-----------------|--------------------|--------------------|-------------------|-------------------|--------------------|
| CON   | 1.43 $\pm$ 0.12 | 0.60 $\pm$ 0.11*** | 1.54 $\pm$ 0.20*** | 0.50 $\pm$ 0.05   | 0.77 $\pm$ 0.19** | 1.46 $\pm$ 0.12*** |
| MOD   | 1.55 $\pm$ 0.22 | 0.89 $\pm$ 0.21    | 1.30 $\pm$ 0.08    | 0.55 $\pm$ 0.07   | 1.17 $\pm$ 0.22   | 2.83 $\pm$ 0.71    |
| PSF.L | 1.43 $\pm$ 0.04 | 0.96 $\pm$ 0.18    | 1.40 $\pm$ 0.06    | 0.45 $\pm$ 0.05*  | 0.94 $\pm$ 0.17*  | 2.48 $\pm$ 0.19    |
| PSF.M | 1.53 $\pm$ 0.21 | 1.07 $\pm$ 0.21*   | 1.56 $\pm$ 0.17*** | 0.45 $\pm$ 0.13*  | 0.89 $\pm$ 0.14** | 2.55 $\pm$ 0.21    |
| PSF.H | 1.50 $\pm$ 0.08 | 0.84 $\pm$ 0.14    | 1.54 $\pm$ 0.19*** | 0.44 $\pm$ 0.05** | 1.22 $\pm$ 0.20   | 2.81 $\pm$ 0.39    |
| PS.L  | 1.42 $\pm$ 0.18 | 0.62 $\pm$ 0.21**  | 1.45 $\pm$ 0.10*   | 0.48 $\pm$ 0.08   | 0.94 $\pm$ 0.17*  | 2.45 $\pm$ 0.49    |
| PS.M  | 1.44 $\pm$ 0.09 | 0.67 $\pm$ 0.10*   | 1.45 $\pm$ 0.11*   | 0.49 $\pm$ 0.05   | 0.78 $\pm$ 0.15** | 1.97 $\pm$ 0.08*** |
| PS.H  | 1.50 $\pm$ 0.08 | 0.69 $\pm$ 0.15*   | 1.47 $\pm$ 0.08*   | 0.51 $\pm$ 0.05   | 0.99 $\pm$ 0.07   | 2.33 $\pm$ 0.27*   |
| PWE.L | 1.46 $\pm$ 0.22 | 0.87 $\pm$ 0.16    | 1.53 $\pm$ 0.21**  | 0.42 $\pm$ 0.09*  | 1.48 $\pm$ 0.30** | 2.88 $\pm$ 0.47    |
| PWE.M | 1.45 $\pm$ 0.23 | 0.78 $\pm$ 0.14    | 1.53 $\pm$ 0.22**  | 0.48 $\pm$ 0.08   | 1.04 $\pm$ 0.20   | 2.28 $\pm$ 0.30**  |
| PWE.H | 1.51 $\pm$ 0.13 | 0.76 $\pm$ 0.16    | 1.50 $\pm$ 0.12*   | 0.49 $\pm$ 0.11   | 0.95 $\pm$ 0.15*  | 1.20 $\pm$ 0.28*** |
| SIM   | 1.55 $\pm$ 0.12 | 0.76 $\pm$ 0.13    | 1.60 $\pm$ 0.12*** | 0.53 $\pm$ 0.05   | 0.94 $\pm$ 0.15*  | 1.37 $\pm$ 0.43*** |

\* indicates a significant difference compared to the model group, \* $P < 0.05$ , \*\* $P < 0.01$ , \*\*\* $P < 0.001$ .

**Supplementary Table 3.** Data output quality status list

| <b>Sample</b> | <b>Reads</b> | <b>Bases</b> | <b>Error rate</b> | <b>Q20</b> | <b>Q30</b> | <b>GC content</b> |
|---------------|--------------|--------------|-------------------|------------|------------|-------------------|
| A4            | 12421004     | 0.621G       | 0.01%             | 97.75%     | 95.24%     | 49.12%            |
| A5            | 12747475     | 0.637G       | 0.01%             | 97.95%     | 95.47%     | 49.46%            |
| A7            | 13296982     | 0.665G       | 0.01%             | 97.74%     | 95.18%     | 50.27%            |
| B2            | 12360128     | 0.618G       | 0.01%             | 98.01%     | 95.64%     | 49.51%            |
| B3            | 13058584     | 0.653G       | 0.01%             | 97.66%     | 95.03%     | 50.42%            |
| B8            | 15247335     | 0.762G       | 0.01%             | 97.52%     | 94.47%     | 48.75%            |
| C3            | 14352960     | 0.718G       | 0.01%             | 98.08%     | 95.81%     | 48.70%            |
| C7            | 12720262     | 0.636G       | 0.01%             | 98.13%     | 95.84%     | 49.31%            |
| C10           | 13779509     | 0.689G       | 0.01%             | 98.08%     | 95.85%     | 48.54%            |
| D1            | 12027228     | 0.601G       | 0.01%             | 97.31%     | 94.17%     | 48.66%            |
| D2            | 13012192     | 0.651G       | 0.01%             | 97.70%     | 95.14%     | 48.90%            |
| D3            | 16546825     | 0.827G       | 0.01%             | 97.76%     | 94.93%     | 48.72%            |
| E1            | 11086312     | 0.554G       | 0.01%             | 97.64%     | 94.93%     | 48.17%            |
| E6            | 11829462     | 0.591G       | 0.01%             | 97.31%     | 94.19%     | 48.70%            |
| E9            | 12183363     | 0.609G       | 0.01%             | 97.41%     | 94.36%     | 48.77%            |
| F5            | 11739384     | 0.587G       | 0.01%             | 97.24%     | 94.04%     | 48.93%            |
| F7            | 14832062     | 0.742G       | 0.01%             | 97.62%     | 94.94%     | 49.46%            |
| F10           | 12638910     | 0.632G       | 0.01%             | 97.72%     | 95.18%     | 48.79%            |
| G1            | 12676623     | 0.634G       | 0.01%             | 97.23%     | 94.02%     | 49.33%            |
| G2            | 12916298     | 0.646G       | 0.01%             | 97.26%     | 94.10%     | 49.16%            |
| G8            | 11043558     | 0.552G       | 0.01%             | 97.49%     | 94.60%     | 49.45%            |
| H1            | 13622367     | 0.681G       | 0.01%             | 97.75%     | 95.23%     | 48.80%            |
| H4            | 14490965     | 0.725G       | 0.01%             | 97.85%     | 95.28%     | 49.47%            |
| H9            | 13594326     | 0.680G       | 0.01%             | 97.61%     | 94.66%     | 48.71%            |
| I2            | 13228996     | 0.661G       | 0.01%             | 97.69%     | 95.12%     | 49.04%            |
| I4            | 15247587     | 0.762G       | 0.01%             | 98.41%     | 96.55%     | 48.71%            |
| I7            | 14030572     | 0.702G       | 0.01%             | 98.46%     | 96.65%     | 48.88%            |

|     |          |        |       |        |        |        |
|-----|----------|--------|-------|--------|--------|--------|
| J2  | 13766445 | 0.688G | 0.01% | 98.04% | 95.66% | 49.77% |
| J6  | 13506671 | 0.675G | 0.01% | 97.71% | 95.16% | 49.78% |
| J7  | 15373809 | 0.769G | 0.01% | 98.31% | 96.34% | 49.22% |
| K1  | 14135749 | 0.707G | 0.01% | 98.13% | 95.91% | 48.91% |
| K5  | 11535959 | 0.577G | 0.01% | 98.33% | 96.40% | 49.01% |
| K6  | 13257891 | 0.663G | 0.01% | 98.08% | 95.69% | 51.80% |
| L1  | 15645729 | 0.782G | 0.01% | 97.68% | 95.09% | 49.21% |
| L9  | 12913291 | 0.646G | 0.01% | 98.06% | 95.74% | 49.24% |
| L10 | 13345779 | 0.667G | 0.01% | 98.08% | 95.80% | 49.77% |

## Note:

- (1) Sample: samples id.
- (2) Reads: The original sequence data is counted, and the number of sequencing sequences of each sequencing file is counted in one unit of four behaviors.
- (3) Bases: The number of sequencing sequences is multiplied by the length of the sequencing sequence and converted to G.
- (4) Error rate: Refers to the sequencing error rate, calculated by the formula 1.
- (5) Q20: The base of the Phred value greater than 20 is a percentage of the total base.
- (6) Q30: Bases with a Phred value greater than 30 as a percentage of the total base.
- (7) GC content: Calculate the sum of the number of bases G and C as a percentage of the total number of bases

**Supplementary Table 4.** Data filtering situation list.

| <b>Sample</b> | <b>Total reads</b>    | <b>N%&gt;10%</b> | <b>Low quality</b> | <b>5 adapter<br/>contaminate</b> | <b>3 adapter null or insert<br/>null</b> | <b>With<br/>plopA/T/G/C</b> | <b>Clean reads</b> |
|---------------|-----------------------|------------------|--------------------|----------------------------------|------------------------------------------|-----------------------------|--------------------|
| A4            | 12421004<br>(100.00%) | 6 (0.00%)        | 47077 (0.38%)      | 1724 (0.01%)                     | 582532 (4.69%)                           | 15281 (0.12%)               | 11774384 (94.79%)  |
| A5            | 12747475<br>(100.00%) | 1575<br>(0.01%)  | 25834 (0.20%)      | 1065(0.01%)                      | 530824 (4.16%)                           | 39828 (0.31%)               | 12148349 (95.30%)  |
| A7            | 13296982<br>(100.00%) | 7(0.00%)         | 48455 (0.36%)      | 1441 (0.01%)                     | 785760 (5.91%)                           | 17485 (0.13%)               | 12443834 (93.58%)  |
| B2            | 12360128<br>(100.00%) | 1494<br>(0.01%)  | 23924 (0.19%)      | 1003(0.01%)                      | 458162 (3.71%)                           | 24201 (0.20%)               | 11851344 (95.88%)  |
| B3            | 13058584<br>(100.00%) | 4 (0.00%)        | 57440 (0.44%)      | 2761(0.02%)                      | 464905 (3.65%)                           | 11015 (0.08%)               | 12522459 (95.89%)  |
| B8            | 15247335<br>(100.00%) | 4691<br>(0.03%)  | 33136 (0.22%)      | 423(0.00%)                       | 453725 (2.98%)                           | 11945 (0.08%)               | 14743415 (96.70%)  |
| C3            | 14353960<br>(100.00%) | 1773<br>(0.01%)  | 30813 (0.21%)      | 531 (0.00%)                      | 457958 (3.19%)                           | 13483 (0.09%)               | 13848402 (96.48%)  |
| C7            | 12720262<br>(100.00%) | 1600<br>(0.01%)  | 23718 (0.19%)      | 614 (0.00%)                      | 409989 (3.22%)                           | 19290 (0.15%)               | 12265051 (96.42%)  |
| C10           | 13779509<br>(100.00%) | 1703<br>(0.01%)  | 26979 (0.20%)      | 343 (0.00%)                      | 569349 (4.13%)                           | 7775 (0.06%)                | 13173360 (95.60%)  |
| D1            | 12027228<br>(100.00%) | 416 (0.00%)      | 104372<br>(0.87%)  | 282 (0.00%)                      | 297642 (2.47%)                           | 6408 (0.05%)                | 11618108 (96.60%)  |
| D2            | 13012192<br>(100.00%) | 6 (0.00%)        | 56766 (0.44%)      | 534 (0.00%)                      | 358024 (2.75%)                           | 8400 (0.06%)                | 12588462(96.74%)   |

## Supplementary Material

|     |                       |                 |                   |              |                |               |                   |
|-----|-----------------------|-----------------|-------------------|--------------|----------------|---------------|-------------------|
| D3  | 16546825<br>(100.00%) | 3097<br>(0.02%) | 15042 (0.09%)     | 361 (0.00%)  | 560212 (3.39%) | 10505 (0.06%) | 15957608 (96.44%) |
| E1  | 11086312<br>(100.00%) | 405 (0.00%)     | 66357 (0.60%)     | 111 (0.00%)  | 271624 (2.45%) | 2624 (0.02%)  | 10745191 (96.44%) |
| E6  | 11829462<br>(100.00%) | 442 (0.00%)     | 110822<br>(0.94%) | 303 (0.00%)  | 378150 (3.20%) | 9273(0.08%)   | 11330472 (95.78%) |
| E9  | 12183363<br>(100.00%) | 445 (0.00%)     | 110251<br>(0.90%) | 412 (0.00%)  | 387636 (3.18%) | 6468 (0.05%)  | 11678151 (95.85%) |
| F5  | 11739384<br>(100.00%) | 442 (0.00%)     | 97003 (0.83%)     | 408 (0.00%)  | 404921 (3.45%) | 11861 (0.10%) | 11224749 (95.62%) |
| F7  | 14832062<br>(100.00%) | 357 (0.00%)     | 45345 (0.31%)     | 2872(0.02%)  | 581680 (3.92%) | 12418 (0.08%) | 14189390 (95.67%) |
| F10 | 12638910<br>(100.00%) | 320 (0.00%)     | 37795 (0.30%)     | 603 (0.00%)  | 392886 (3.11%) | 20671 (0.16%) | 12186635 (96.42%) |
| G1  | 12676623<br>(100.00%) | 479 (0.00%)     | 108109<br>(0.85%) | 678 (0.01%)  | 602912 (4.76%) | 16634 (0.13%) | 11947811 (94.25%) |
| G2  | 12916298<br>(100.00%) | 485 (0.00%)     | 111623<br>(0.86%) | 749 (0.01%)  | 467450 (3.62%) | 18579 (0.14%) | 12317412 (95.36%) |
| G8  | 11043558<br>(100.00%) | 411 (0.00%)     | 65508 (0.59%)     | 370 (0.00%)  | 394403 (3.57%) | 7898(0.07%)   | 10574968 (95.76%) |
| H1  | 13622367<br>(100.00%) | 10 (0.00%)      | 57329 (0.42%)     | 630 (0.00%)  | 478369 (3.51%) | 10069 (0.07%) | 13075960 (95.99%) |
| H4  | 14490965<br>(100.00%) | 1787<br>(0.01%) | 30435 (0.21%)     | 1135 (0.01%) | 496149 (3.42%) | 19645(0.14%)  | 13941814 (96.21%) |
| H9  | 13594326<br>(100.00%) | 1697<br>(0.01%) | 28910 (0.21%)     | 734 (0.01%)  | 427041 (3.73%) | 10452(0.08%)  | 13125492 (96.55%) |
| I2  | 13228996<br>(100.00%) | 14 (0.00%)      | 53939 (0.41%)     | 719 (0.01%)  | 493499 (3.73%) | 17861 (0.14%) | 12662964 (95.72%) |

|     |                       |                 |               |              |                |               |                   |
|-----|-----------------------|-----------------|---------------|--------------|----------------|---------------|-------------------|
| I4  | 15247587<br>(100.00%) | 2361<br>(0.02%) | 44480 (0.29%) | 698 (0.00%)  | 385331 (2.53%) | 12993 (0.09%) | 14801724 (97.08%) |
| I7  | 14030572<br>(100.00%) | 2109<br>(0.02%) | 33465 (0.24%) | 783 (0.01%)  | 436204 (3.11%) | 10082 (0.07%) | 13547929 (96.56%) |
| J2  | 13766445<br>(100.00%) | 1667<br>(0.01%) | 26873 (0.20%) | 1101 (0.01%) | 493111 (3.58%) | 12036 (0.09%) | 13231657(96.12%)  |
| J6  | 13506671<br>(100.00%) | 8(0.00%)        | 64474 (0.48%) | 2141(0.02%)  | 513341 (3.80%) | 13724 (0.10%) | 12912983 (95.60%) |
| J7  | 15373809<br>(100.00%) | 2334<br>(0.02%) | 40429 (0.26%) | 962 (0.01%)  | 576533 (3.75%) | 10229 (0.07%) | 14743322 (95.90%) |
| K1  | 14135749<br>(100.00%) | 1704<br>(0.01%) | 26427 (0.19%) | 634 (0.00%)  | 493985 (3,49%) | 11003 (0.08%) | 13601996 (96.22%) |
| K5  | 11535959<br>(100.00%) | 1701<br>(0.01%) | 31139 (0.27%) | 680 (0.01%)  | 407006 (3.53%) | 8764 (0.08%)  | 11086669 (96.11%) |
| K6  | 13257891<br>(100.00%) | 1621<br>(0.01%) | 21821 (0.16%) | 1167 (0.01%) | 412921 (3.11%) | 46797 (0.35%) | 12773564 (96.35%) |
| L1  | 15645729<br>(100.00%) | 10(0.00%)       | 51957 (0.33%) | 2529(0.02%)  | 664894 (4.25%) | 27934 (0.18%) | 14898405 (95.22%) |
| L9  | 12913291<br>(100.00%) | 1601<br>(0.01%) | 24133 (0.19%) | 905(0.01%)   | 42661 (3.30%)  | 17996 (0.14%) | 12442040 (96.35%) |
| L10 | 13345779<br>(100.00%) | 1602<br>(0.01%) | 26494 (0.20%) | 1158(0.01%)  | 489044 (3,66%) | 21224 (0.16%) | 12806257 (95.96%) |

Note:

- (1) Sample: sample id.
- (2) total\_reads: Count the number of original sequence data.
- (3) N% > 10%: The ratio of the number of reads filtered out and the total number of raw reads due to the N content exceeding 10%.
- (4) low quality: Due to low quality, the number of copies that are filtered out and their proportion to the total number of raw reads.
- (5) 5\_adapter\_contamine: The number of reads that are filtered out and their proportion to the total number of raw reads due to the 5' joint.

(6) 3\_adapter\_null or insert\_null: The number of reads that are filtered out and their proportion to the total number of raw reads, since there are no 3' connectors or no inserts.

(7) with polyA/T/G/C: The number of reads filtered and their proportion to the total number of raw reads due to the inclusion of polyA/T/G/C.

(8) clean reads: The resulting number of clean reads and their proportion to the total number of raw read



**Supplementary Table 5.** Alignment with reference genome.

| <b>Sample</b> | <b>Total sRNA</b>  | <b>Mapped sRNA</b> | <b>“+” Mapped sRNA</b> | <b>“ - ” Mapped sRNA</b> |
|---------------|--------------------|--------------------|------------------------|--------------------------|
| A4            | 9957773 (100.00%)  | 9171075 (92.10%)   | 5827771 (58.52%)       | 3343304 (33.57%)         |
| A5            | 9929824 (100.00%)  | 8989999 (90.54%)   | 5093774 (51.30%)       | 3896225 (39.24%)         |
| A7            | 9062665 (100.00%)  | 8386298 (92.54%)   | 5508280 (60.28%)       | 2878018 (31.76%)         |
| B2            | 9877613 (100.00%)  | 9058975 (91.71%)   | 4969564 (50.31%)       | 4098411 (41.40%)         |
| B3            | 10903089 (100.00%) | 10199924 (93.55%)  | 7411371 (67.97%)       | 2788553 (25.58%)         |
| B8            | 14215131 (100.00%) | 13073698 (91.97%)  | 7264916 (51.11%)       | 5808782 (40.86%)         |
| C7            | 11789813 (100.00%) | 10265833 (87.07%)  | 5450452 (46.23%)       | 4815381 (40.84%)         |
| C10           | 12544891 (100.00%) | 11648895 (92.86%)  | 6067417 (48.37%)       | 5581478 (44.49%)         |
| D1            | 10995598 (100.00%) | 10092981 (91.79%)  | 5821993 (52.95%)       | 4270988 (38.84%)         |
| D2            | 11785873 (100.00%) | 10980277 (93.16%)  | 6115128 (51.89%)       | 4865149 (41.28%)         |
| D3            | 15162458(100.00%)  | 13899690 (91.67%)  | 8161808 (53.83%)       | 5737882 (37.84%)         |
| E1            | 10531734(100.00%)  | 9807608 (93.12%)   | 3263862 (30.99%)       | 6543746 (62.13%)         |
| E6            | 10656185 (100.00%) | 9661029 (90.66%)   | 5337571 (50.09%)       | 4323458 (40.57%)         |
| E9            | 10999441 (100.00%) | 10171968 (92.48%)  | 5244069 (47.68%)       | 4927899 (44.80%)         |
| F5            | 10285683 (100.00%) | 9236454 (90.06%)   | 5058089 (49.18%)       | 4205405 (40.89%)         |
| F7            | 12806146 (100.00%) | 11498360 (89.79%)  | 7307487 (57.06%)       | 4190873 (32.73%)         |
| F10           | 11705711 (100.00%) | 10878172 (92.93%)  | 6097979 (52.09%)       | 4780193 (40.84%)         |

|     |                    |                   |                  |                     |
|-----|--------------------|-------------------|------------------|---------------------|
| G1  | 10488619 (100.00%) | 9543915 (90.99%)  | 5345553 (50.97%) | 4632411<br>(40.88%) |
| G2  | 1133087 (100.00%)  | 10179499 (89.84%) | 5547088 (48.96%) | 4198362<br>(40.03%) |
| G8  | 10193191 (100.00%) | 9000777 (88.30%)  | 4356897 (42.74%) | 4643880<br>(45.56%) |
| H1  | 12344375 (100.00%) | 11407697 (92.41%) | 5830137 (47.23%) | 5577560<br>(45.18%) |
| H4  | 12887729 (100.00%) | 11935831 (92.61%) | 7129792 (55.32%) | 4806039<br>(37.29%) |
| H9  | 12466355 (100.00%) | 11588383 (92.96%) | 6222783 (49.92%) | 5365600<br>(43.04%) |
| I2  | 11859522 (100.00%) | 10609054 (89.46%) | 5279823 (44.52%) | 5329231<br>(44.94%) |
| I4  | 13863420 (100.00%) | 12804597 (92.36%) | 7061094 (50.93%) | 5743503<br>(41.43%) |
| I7  | 12803089 (100.00%) | 11548265 (90.20%) | 5818854 (45.45%) | 5729411<br>(44.75%) |
| J2  | 11703399 (100.00%) | 10803163 (92.31%) | 6412740 (54.79%) | 4390423<br>(37.51%) |
| J6  | 11334709(100.00%)  | 10483748 (92.49%) | 6734790 (59.42%) | 3748959<br>(33.08%) |
| J7  | 13656246 (100.00%) | 12661944 (92.72%) | 6656399 (48.74%) | 6005545<br>(43.98%) |
| K1  | 12633606 (100.00%) | 11742813 (92.95%) | 5912644 (46.80%) | 5830169<br>(46.15%) |
| K5  | 10496375(100.00%)  | 9610236 (91.56%)  | 5089336 (48.49%) | 4520900<br>(43.07%) |
| K6  | 12052339 (100.00%) | 10509833 (87.20%) | 7829142 (64.96%) | 2680691<br>(22.24%) |
| L1  | 12682274 (100.00%) | 11549158 (91.07%) | 7145029 (56.34%) | 4041129<br>(34.73%) |
| L9  | 11170677 (100.00%) | 10360595(92.75%)  | 5237357 (46.88%) | 5123238<br>(45.86%) |
| L10 | 11873978 (100.00%) | 10925397 (92.01%) | 6402049 (53.92%) | 4523348<br>(38.09%) |

Note: (1) Sample: sample id.

(2) Total sRNA: The total number of reads obtained for each sample after analysis of "sRNA length screening".

(3) Mapped sRNA: The number of reads and percentages that can be mapped to the reference sequence in the sample reads.

(4) “+” Mapped sRNA: The number of reads and the percentage of the same chain that can be mapped to the reference sequence in the sample reads.

(5) “-” Mapped sRNA: The sample reads mapped to the number of reads in the opposite direction of the reference sequence and the percentage

**Supplementary Table 6.** sRNA classification statistics table

| Types           | total        | Known-miRNA | rRN<br>A   | tRNA       | snRN<br>A | snoRN<br>A | repeat | Novel-miRNA | Exon:+  | Exon:- | Intron:+ | Intron<br>:- | other   |
|-----------------|--------------|-------------|------------|------------|-----------|------------|--------|-------------|---------|--------|----------|--------------|---------|
| A4              | 9171075      | 4204528     | 3426<br>7  | 20391<br>9 | 10172     | 61383      | 201227 | 656         | 249226  | 31834  | 182887   | 68993        | 3921983 |
| A4              | 100.00%      | 45.85%      | 0.37<br>%  | 2.22%      | 0.11%     | 0.67%      | 2.19%  | 0.01%       | 2.72%   | 0.35%  | 1.99%    | 0.75%        | 42.76%  |
| A5              | 8989999      | 2778375     | 4454<br>8  | 29834<br>4 | 24059     | 79704      | 436643 | 407         | 1092458 | 51478  | 361607   | 61667        | 3760709 |
| A5              | 100.00%      | 30.91%      | 0.50<br>%  | 3.32%      | 0.27%     | 0.89%      | 4.86%  | 0.00%       | 12.15%  | 0.57%  | 4.02%    | 0.69%        | 41.83%  |
| A7              | 8386298      | 3903214     | 3810<br>2  | 15859<br>5 | 8552      | 57769      | 258959 | 767         | 320828  | 36934  | 199888   | 71437        | 3331253 |
| A7<br>(percent) | 100.00%      | 46.54%      | 0.45<br>%  | 1.89%      | 0.10%     | 0.69%      | 3.09%  | 0.01%       | 3.83%   | 0.44%  | 2.38%    | 0.85%        | 39.72%  |
| B2              | 9058975      | 3546089     | 5041<br>6  | 12855<br>4 | 14240     | 72761      | 417005 | 653         | 826165  | 65150  | 296003   | 99042        | 3542897 |
| B2              | 100.00%      | 39.14%      | 0.56<br>%  | 1.42%      | 0.16%     | 0.80%      | 4.60%  | 0.01%       | 9.12%   | 0.72%  | 3.27%    | 1.09%        | 39.11%  |
| B3              | 1019992<br>4 | 3968744     | 1042<br>73 | 13909      | 10859     | 87033      | 295361 | 937         | 220353  | 100324 | 501140   | 228401       | 4668590 |
| B3<br>(percent) | 100.00%      | 38.91%      | 1.02<br>%  | 0.14%      | 0.11%     | 0.85%      | 2.90%  | 0.01%       | 2.16%   | 0.98%  | 4.91%    | 2.24%        | 45.77%  |
| B8              | 1307369<br>8 | 6831682     | 3114<br>9  | 26799      | 8817      | 107581     | 365228 | 776         | 171375  | 40742  | 200158   | 80529        | 5217862 |

|                 |              |         |            |            |       |        |             |       |        |       |        |        |         |
|-----------------|--------------|---------|------------|------------|-------|--------|-------------|-------|--------|-------|--------|--------|---------|
| B8<br>(percent) | 100.00%      | 52.26%  | 0.24<br>%  | 0.20%      | 0.07% | 0.82%  | 2.72%       | 0.01% | 1.31%  | 1.53% | 0.62%  | 0.62%  | 39.91%  |
| C3              | 1188668<br>5 | 5583766 | 4094<br>5  | 16110<br>3 | 6661  | 127456 | 310086      | 820   | 273182 | 39880 | 204752 | 87903  | 5050031 |
| C3<br>(percent) | 100.00%      | 46.97%  | 0.34<br>%  | 1.36%      | 0.06% | 1.07%  | 2.61%       | 0.01% | 2.30%  | 0.34% | 1.72%  | 0.74%  | 42.48%  |
| C7              | 1026583<br>3 | 3720987 | 3065<br>9  | 15659<br>6 | 8880  | 155388 | 109447<br>1 | 516   | 526740 | 24591 | 241638 | 53017  | 4252350 |
| C7<br>(percent) | 100.00%      | 36.25%  | 0.30<br>%  | 1.53%      | 0.09% | 1.51%  | 10.66<br>%  | 0.01% | 5.13%  | 0.24% | 2.35%  | 0.52%  | 41.42%  |
| C10             | 1164889<br>5 | 6122783 | 3118<br>1  | 17684      | 4081  | 130417 | 168951      | 653   | 142429 | 30510 | 164445 | 63332  | 4772429 |
| C10             | 100.00%      | 52.56%  | 0.27<br>%  | 0.15%      | 0.04% | 1.12%  | 1.45%       | 0.01% | 1.22%  | 0.26% | 1.41%  | 0.54%  | 40.97%  |
| D1              | 1009298<br>1 | 5825375 | 1948<br>7  | 28060      | 3637  | 54518  | 85816       | 648   | 113869 | 14531 | 89757  | 33016  | 3824267 |
| D1<br>(percent) | 100.00%      | 57.72%  | 0.19<br>%  | 0.28%      | 0.04% | 0.54%  | 0.85%       | 0.01% | 1.13%  | 0.14% | 0.89%  | 0.33%  | 37.89%  |
| D2              | 1098027<br>7 | 5506507 | 5541<br>14 | 19839      | 5940  | 123810 | 295301      | 868   | 168381 | 59717 | 309541 | 132925 | 4303334 |
| D2<br>(percent) | 100.00%      | 50.15%  | 0.49<br>%  | 0.18%      | 0.05% | 1.13%  | 2.69%       | 0.01% | 1.53%  | 0.54% | 2.82%  | 1.21%  | 39.19%  |
| D3              | 1389969<br>0 | 7263692 | 3964<br>3  | 67429      | 5784  | 104998 | 296517      | 878   | 178336 | 32047 | 201774 | 62058  | 5646534 |
| D3<br>(percent) | 100.00%      | 52.26%  | 0.29<br>%  | 0.49%      | 0.04% | 0.76%  | 2.13%       | 0.01% | 1.28%  | 0.23% | 1.45%  | 0.45%  | 40.62%  |
| E1              | 9807608      | 6212784 | 1062<br>1  | 3238       | 1636  | 52028  | 72301       | 369   | 27990  | 11631 | 70721  | 56473  | 3277816 |

|                  |              |         |           |            |           |        |        |       |        |       |        |       |          |
|------------------|--------------|---------|-----------|------------|-----------|--------|--------|-------|--------|-------|--------|-------|----------|
| E1<br>(percent)  | 100.00%      | 63.35%  | 0.11<br>% | 0.03%      | 0.02%     | 0.53%  | 0.74%  | 0.00% | 0.39%  | 0.12% | 0.72%  | 0.58% | 33.42%   |
| E6               | 9661029      | 5123747 | 2854<br>5 | 75351      | 6327      | 75574  | 160480 | 771   | 171946 | 21427 | 141435 | 39386 | 3816040  |
| E6<br>(percent)  | 100.00%      | 53.04%  | 0.30<br>% | 0.78%      | 0.07%     | 0.78%  | 1.66%  | 0.01% | 1.78%  | 0.22% | 1.46%  | 0.41% | 39.50%   |
| E9               | 1017196<br>8 | 5512522 | 3880<br>9 | 11289      | 3897      | 60299  | 138366 | 832   | 121393 | 47183 | 210237 | 99861 | 39272279 |
| E9<br>(percent)  | 100.00%      | 54.19%  | 0.38<br>% | 0.11%      | 0.04%     | 0.59%  | 1.36%  | 0.01% | 1.19%  | 0.46% | 2.07%  | 0.98% | 38.61%   |
| F5               | 9263494      | 4637459 | 2482<br>3 | 55995      | 6476      | 106484 | 225660 | 718   | 250534 | 19753 | 139438 | 47125 | 3749029  |
| F5<br>(percent)  | 100.00%      | 50.06%  | 0.27<br>% | 0.60%      | 0.07%     | 1.15%  | 2.44%  | 0.01% | 2.70%  | 0.21% | 1.51%  | 0.51% | 40.47%   |
| F7               | 1149836<br>0 | 4386525 | 8530<br>7 | 25036<br>8 | 15708     | 108376 | 580561 | 573   | 283608 | 38234 | 351264 | 79459 | 5318377  |
| F7<br>(percent)  | 100.00%      | 38.15%  | 0.74<br>% | 2.18%      | 0.14%     | 0.94%  | 5.05%  | 0.00% | 2.47%  | 0.33% | 3.05%  | 0.69% | 46.25%   |
| F10              | 1087817<br>2 | 6196044 | 1802<br>7 | 12468      | 7503      | 126535 | 302076 | 591   | 131528 | 39780 | 121884 | 47831 | 3873905  |
| F10<br>(percent) | 100.00%      | 56.96%  | 0.17<br>% | 0.11%      | 0.07<br>% | 1.16%  | 2.78%  | 0.01% | 1.21%  | 0.37% | 1.12%  | 0.44% | 35.61%   |
| G1               | 9543915      | 4432083 | 4334<br>1 | 66308      | 13539     | 101871 | 287886 | 720   | 361246 | 45208 | 245434 | 94028 | 3852251  |
| G1<br>(percent)  | 100.00%      | 46.44%  | 0.45<br>% | 0.69%      | 0.14%     | 1.07%  | 3.02%  | 0.01% | 3.79%  | 0.47% | 2.57%  | 0.99% | 40.36%   |

|                 |              |         |            |       |       |        |             |       |        |        |        |        |         |
|-----------------|--------------|---------|------------|-------|-------|--------|-------------|-------|--------|--------|--------|--------|---------|
| G2              | 1017949<br>9 | 4347371 | 4511<br>9  | 45119 | 13713 | 129654 | 339322      | 785   | 472886 | 49994  | 307474 | 112198 | 4307953 |
| G2<br>(percent) | 100.00%      | 42.71%  | 0.44<br>%  | 0.52% | 0.13% | 1.27%  | 3.33%       | 0.01% | 4.65%  | 0.49%  | 3.02%  | 1.10%  | 43.32%  |
| G8              | 9000777      | 4298224 | 1787<br>4  | 4828  | 6959  | 89223  | 104360<br>8 | 367   | 94949  | 32965  | 200393 | 53731  | 3157656 |
| G8<br>(percent) | 100.00%      | 47.75%  | 0.20<br>%  | 0.05% | 0.08% | 0.99%  | 11.59<br>%  | 0.00% | 1.05%  | 0.37%  | 2.23%  | 0.60%  | 35.08%  |
| H1              | 1140769<br>7 | 5510667 | 2968<br>8  | 39334 | 6166  | 91689  | 173302      | 756   | 201718 | 27832  | 161974 | 69701  | 5094870 |
| H1<br>(percent) | 100.00%      | 48.31%  | 0.26<br>%  | 0.34% | 0.05% | 0.80%  | 1.52%       | 0.01% | 1.77%  | 0.24%  | 1.42%  | 0.61%  | 44.66%  |
| H4              | 1193583<br>1 | 4615265 | 1011<br>32 | 52811 | 17705 | 146698 | 419309      | 757   | 536660 | 116568 | 612353 | 276510 | 5040063 |
| H4<br>(percent) | 100.00%      | 38.67%  | 0.85<br>%  | 0.44% | 0.15% | 1.23%  | 3.51%       | 0.01% | 4.50%  | 0.98%  | 5.13%  | 2.32%  | 42.23%  |
| H9              | 1158838<br>3 | 5650623 | 5790<br>6  | 30250 | 9585  | 134558 | 211005      | 851   | 259547 | 56155  | 303262 | 134116 | 4740525 |
| H9<br>(percent) | 100.00%      | 48.76%  | 0.50<br>%  | 0.26% | 0.08% | 1.16%  | 1.82%       | 0.01% | 2.24%  | 0.48%  | 2.62%  | 1.16%  | 40.91%  |
| I2              | 1060905<br>4 | 4309058 | 2265<br>7  | 67631 | 10883 | 121601 | 449848      | 570   | 426596 | 20348  | 222883 | 49493  | 4907486 |
| I2<br>(percent) | 100.00%      | 40.62%  | 0.21<br>%  | 0.64% | 0.10% | 1.15%  | 4.24%       | 0.01% | 4.02%  | 0.19%  | 2.10%  | 0.47%  | 46.26%  |
| I4              | 1280459<br>7 | 6454381 | 3343<br>9  | 54707 | 9917  | 101670 | 201840      | 875   | 209406 | 34731  | 208570 | 74042  | 5421092 |
| I4<br>(percent) | 100.00%      | 50.41%  | 0.26<br>%  | 0.43% | 0.08% | 0.79%  | 1.58%       | 0.01% | 1.64%  | 0.27%  | 1.63%  | 0.58%  | 42.34%  |

|                 |              |         |            |       |       |        |        |       |        |        |         |        |         |
|-----------------|--------------|---------|------------|-------|-------|--------|--------|-------|--------|--------|---------|--------|---------|
| I7              | 1154826<br>5 | 4851303 | 4450<br>4  | 57796 | 7554  | 85585  | 334233 | 792   | 229085 | 45044  | 285772  | 106891 | 5499706 |
| I7<br>(percent) | 100.00%      | 42.01%  | 0.39<br>%  | 0.50% | 0.07% | 0.74%  | 2.89%  | 0.01% | 1.98%  | 0.39%  | 2.47%   | 0.93%  | 47.62%  |
| J2              | 1080316<br>3 | 4265750 | 8298<br>7  | 16619 | 11236 | 114573 | 401294 | 1087  | 233455 | 93272  | 445349  | 197157 | 4940384 |
| J2<br>(percent) | 100.00%      | 39.49%  | 0.77<br>%  | 0.15% | 0.10% | 1.06%  | 3.71%  | 0.01% | 2.16%  | 0.86%  | 4.12%   | 1.82%  | 45.73%  |
| J6              | 1048374<br>9 | 4854940 | 5404<br>1  | 23719 | 5666  | 117066 | 270253 | 825   | 137414 | 43309  | 248659  | 95348  | 4632509 |
| J6<br>(percent) | 100.00%      | 46.31%  | 0.52<br>%  | 0.23% | 0.05% | 1.12%  | 2.58%  | 0.01% | 1.31%  | 0.41%  | 2.37%   | 0.91%  | 44.19%  |
| J7              | 1266194      | 5524136 | 8761<br>0  | 12684 | 8269  | 126937 | 288270 | 984   | 180639 | 88913  | 443552  | 190770 | 5709180 |
| J7<br>(percent) | 100.00%      | 43.63%  | 0.69<br>%  | 0.10% | 0.07% | 1.00%  | 2.28%  | 0.01% | 1.43%  | 0.70%  | 3.50%   | 1.51%  | 45.09%  |
| K1              | 1174281<br>3 | 5813863 | 4464<br>6  | 64883 | 8983  | 134745 | 282638 | 794   | 208819 | 50835  | 264058  | 105690 | 4762859 |
| K1<br>(percent) | 100.00%      | 49.51%  | 0.38<br>%  | 0.55% | 0.08% | 1.15%  | 2.41%  | 0.01% | 1.78%  | 0.43%  | 2.25%   | 0.90%  | 40.56%  |
| K5              | 9610236      | 4316483 | 5522<br>0  | 2764  | 4728  | 90957  | 269267 | 735   | 116912 | 57841  | 288958  | 120055 | 4286316 |
| K5<br>(percent) | 100.00%      | 44.92%  | 0.57<br>%  | 0.03% | 0.05% | 0.95%  | 2.80%  | 0.01% | 1.22%  | 0.60%  | 3.01%   | 1.25%  | 44.60%  |
| K6              | 1050983<br>3 | 3267238 | 1010<br>37 | 1553  | 23438 | 147016 | 801247 | 426   | 246649 | 154164 | 1014171 | 214581 | 4538313 |



|                  |              |         |            |            |       |        |        |       |        |        |        |        |         |
|------------------|--------------|---------|------------|------------|-------|--------|--------|-------|--------|--------|--------|--------|---------|
| K6<br>(percent)  | 100.00%      | 31.09%  | 0.96<br>%  | 0.01%      | 0.22% | 1.40%  | 7.62%  | 0.00% | 2.35%  | 1.47%  | 9,65%  | 2.04%  | 43.18%  |
| L1               | 1154915<br>8 | 4742850 | 3852<br>4  | 23235<br>9 | 24562 | 127099 | 532106 | 699   | 632988 | 32881  | 302033 | 66349  | 4810408 |
| L1<br>(percent)  | 100.00%      | 41.07%  | 0.33<br>%  | 2.01%      | 0.21% | 1.10%  | 4.61%  | 0.01% | 5.54%  | 0.28%  | 2.62%  | 0.57%  | 41.65%  |
| L9               | 1036059<br>5 | 4647723 | 4260<br>9  | 53178      | 16186 | 104978 | 388417 | 830   | 415239 | 52345  | 341389 | 107633 | 4190068 |
| L9<br>(percent)  | 100.00%      | 44.86%  | 0.41<br>%  | 0.51%      | 0.16% | 1.01%  | 3.75%  | 0.01% | 4.01%  | 0.51%  | 3.30%  | 1.04%  | 40.44%  |
| L10              | 1092539<br>7 | 3975475 | 1088<br>56 | 85895      | 14080 | 162498 | 439963 | 797   | 413565 | 123115 | 620475 | 241249 | 4739429 |
| L10<br>(percent) | 100.00%      | 36.39%  | 1.00<br>%  | 0.79%      | 0.13% | 1.49%  | 4.03%  | 0.01% | 3.79%  | 1.13%  | 5.68%  | 2.21%  | 43.38%  |

Note: > total: Refers to the number of sRNAs in each sample compared to the reference sequence, followed by a reference to calculate the proportion of each type of sRNA.

> known\_miRNA: Refers to the number and proportion of sRNAs that are compared to known miRNAs for each sample.

> rRNA/tRNA/snRNA/snoRNA: Refers to the number and proportion of rRNA/tRNA/snRNA/snoRNA sRNA in each sample.

> novel\_miRNA: Refers to the number and proportion of sRNA in each sample compared to the new miRNA.

> exon: +/exon: -/intron: +/intron: - : Refers to a sample comparison to the number of exon/intron positive and negative chains and their proportion.

> other: Refers to the comparison of each sample to the reference sequence, but does not compare the number and proportion of sRNAs to known miRNAs, ncRNAs, new miRNAs, and exons and intron regions

**Supplementary Table 7.** 135 (partially repeated) differentially expressed miRNA expression levels between groups

| <b>miRNA</b>    | <b>CON</b> | <b>MOD</b> | <b>PSF.L</b> | <b>PSF.M</b> | <b>PSF.H</b> | <b>PS.L</b> | <b>PS.M</b> | <b>PS.H</b> | <b>WE.L</b> | <b>WE.M</b> | <b>WE.H</b> | <b>SIM</b> |
|-----------------|------------|------------|--------------|--------------|--------------|-------------|-------------|-------------|-------------|-------------|-------------|------------|
| rno-miR-200a-5p | 81.91      | 276.75     | 620.04       | 400.67       | 386.67       | 495.67      | 462.00      | 270.00      | 390.00      | 314.67      | 372.33      | 401.00     |
| rno-miR-3548    | 68.81      | 224.32     | 500.89       | 312.67       | 310.33       | 398.67      | 360.00      | 205.00      | 312.67      | 256.67      | 282.33      | 324.33     |
| rno-miR-455-3p  | 99.07      | 200.60     | 184.67       | 319.00       | 187.67       | 256.67      | 204.33      | 187.33      | 193.33      | 277.00      | 418.00      | 157.00     |
| rno-miR-155-5p  | 76.38      | 124.64     | 166.33       | 105.07       | 100.00       | 96.00       | 94.00       | 105.33      | 139.67      | 145.00      | 277.82      | 112.33     |
| rno-miR-139-5p  | 1158.96    | 1701.24    | 2105.00      | 1955.33      | 1683.33      | 2347.00     | 2039.00     | 1989.67     | 2264.00     | 2525.67     | 3363.00     | 1916.00    |
| rno-miR-200b-5p | 12.68      | 33.93      | 41.00        | 50.33        | 25.33        | 42.00       | 39.67       | 25.33       | 25.33       | 31.67       | 64.67       | 35.67      |
| rno-let-7g-3p   | 0.79       | 6.48       | 2.67         | 4.00         | 4.00         | 3.33        | 2.67        | 2.67        | 3.67        | 2.67        | 2.33        | 4.33       |
| rno-miR-184     | 28.41      | 77.23      | 81.00        | 193.67       | 58.00        | 146.00      | 46.00       | 88.00       | 57.67       | 9.29        | 37.67       | 47.00      |
| rno-miR-375-3p  | 1227.95    | 2132.58    | 3181.00      | 3307.33      | 3012.00      | 3838.00     | 2546.00     | 2396.33     | 2438.00     | 3168.67     | 2622.00     | 3351.33    |
| rno-miR-126b    | 97.58      | 59.45      | 76.67        | 65.00        | 72.67        | 76.33       | 52.33       | 64.67       | 70.67       | 86.00       | 53.33       | 77.00      |
| rno-miR-101a-3p | 33591.11   | 22931.01   | 27996.33     | 31088.00     | 31374.67     | 30197.00    | 18560.67    | 27828.67    | 26014.00    | 29140.67    | 23893.33    | 33227.67   |
| rno-miR-455-5p  | 876.80     | 1547.60    | 2488.67      | 1886.33      | 1693.67      | 1980.33     | 1591.33     | 2314.67     | 2666.67     | 2460.33     | 1146.33     | 1534.00    |

---

|                 |         |         |         |         |         |         |         |         |         |         |         |         |
|-----------------|---------|---------|---------|---------|---------|---------|---------|---------|---------|---------|---------|---------|
| rno-miR-204-5p  | 35.71   | 12.79   | 48.67   | 42.00   | 41.67   | 32.67   | 24.67   | 42.33   | 43.67   | 42.33   | 36.00   | 47.33   |
| rno-miR-144-5p  | 231.32  | 122.39  | 252.33  | 184.33  | 222.33  | 429.00  | 257.33  | 212.33  | 153.00  | 246.00  | 194.33  | 134.00  |
| rno-miR-451-5p  | 1689.67 | 1608.98 | 5138.57 | 2480.33 | 2106.33 | 7869.33 | 6667.33 | 3802.33 | 2646.33 | 3025.33 | 3362.33 | 2310.67 |
| rno-miR-27a-5p  | 148.33  | 129.96  | 355.80  | 164.00  | 165.00  | 148.00  | 172.00  | 180.67  | 249.67  | 258.33  | 221.00  | 110.00  |
| rno-miR-486     | 644.67  | 731.48  | 1866.79 | 1192.33 | 1665.33 | 6529.67 | 3689.33 | 979.00  | 766.33  | 1087.33 | 1600.67 | 911.67  |
| rno-miR-193b-3p | 85.00   | 150.68  | 81.38   | 175.33  | 125.33  | 150.33  | 93.00   | 136.00  | 143.33  | 233.33  | 175.33  | 176.67  |
| rno-miR-218a-5p | 235.00  | 257.96  | 396.82  | 259.00  | 303.67  | 459.67  | 275.33  | 282.33  | 334.33  | 351.00  | 232.33  | 262.00  |
| rno-miR-218b    | 220.00  | 241.68  | 369.71  | 241.67  | 288.00  | 436.33  | 260.67  | 265.67  | 318.33  | 334.00  | 218.00  | 249.00  |
| rno-miR-6329    | 77.00   | 88.17   | 150.34  | 141.61  | 109.00  | 129.67  | 141.61  | 161.69  | 136.60  | 142.00  | 123.00  | 126.67  |
| novel_380       | 96.33   | 152.08  | 69.97   | 113.67  | 86.00   | 68.81   | 85.00   | 110.33  | 73.96   | 168.00  | 166.33  | 137.33  |
| rno-miR-674-5p  | 100.67  | 144.02  | 74.62   | 142.67  | 72.00   | 120.67  | 81.00   | 95.33   | 103.33  | 155.00  | 136.33  | 94.00   |
| rno-miR-34a-5p  | 295.00  | 594.17  | 1008.10 | 1082.67 | 1037.31 | 1168.33 | 423.67  | 722.33  | 862.67  | 1037.31 | 663.33  | 884.00  |
| rno-miR-27b-5p  | 30.67   | 33.11   | 63.66   | 64.67   | 46.00   | 43.67   | 42.00   | 56.00   | 55.67   | 62.25   | 51.33   | 45.67   |
| rno-miR-872-3p  | 54.33   | 67.10   | 36.17   | 55.33   | 41.67   | 64.67   | 39.67   | 44.67   | 62.67   | 103.00  | 46.33   | 71.33   |

---

|                 |           |                |           |                |           |            |               |               |           |           |                |               |
|-----------------|-----------|----------------|-----------|----------------|-----------|------------|---------------|---------------|-----------|-----------|----------------|---------------|
| rno-miR-3591    | 570349.00 | 678984.32      | 441138.29 | 919571.0<br>0  | 458747.33 | 695366.67  | 404941.6<br>7 | 559518.3<br>3 | 444524.91 | 457994.27 | 640041.33      | 486635.0<br>0 |
| rno-miR-194-5p  | 58675.33  | 77880.16       | 51100.88  | 75951.67       | 52896.33  | 60330.00   | 46669.00      | 64133.33      | 61899.00  | 84747.67  | 40791.33       | 66772.33      |
| rno-miR-122-5p  | 924354.33 | 1045670.2<br>7 | 643091.25 | 1273570.<br>33 | 630795.67 | 1078007.00 | 588732.6<br>7 | 837387.0<br>0 | 748935.00 | 842153.33 | 1007918.3<br>3 | 761266.3<br>3 |
| rno-miR-1247-3p | 31.67     | 24.10          | 52.61     | 74.28          | 47.00     | 22.00      | 21.67         | 28.00         | 45.33     | 33.67     | 113.67         | 15.33         |
| rno-miR-146b-5p | 540.33    | 683.49         | 1116.24   | 881.33         | 629.33    | 954.00     | 650.00        | 640.67        | 832.33    | 746.33    | 1085.33        | 612.00        |
| rno-miR-3556b   | 396.00    | 433.77         | 260.74    | 410.33         | 305.67    | 385.67     | 278.33        | 373.00        | 417.00    | 643.00    | 246.33         | 474.33        |
| rno-miR-29c-3p  | 410.33    | 447.12         | 269.89    | 423.33         | 312.00    | 396.67     | 285.67        | 388.00        | 427.67    | 659.00    | 250.00         | 489.33        |
| rno-miR-21-3p   | 54.67     | 54.94          | 64.00     | 13.21          | 29.67     | 32.67      | 20.82         | 34.33         | 39.33     | 46.67     | 37.33          | 40.00         |
| rno-miR-142-3p  | 387.33    | 697.61         | 884.67    | 256.23         | 322.05    | 840.67     | 441.67        | 713.00        | 840.67    | 1160.67   | 968.33         | 668.33        |
| rno-miR-32-5p   | 178.67    | 226.89         | 257.67    | 114.40         | 144.00    | 217.33     | 124.00        | 202.00        | 240.00    | 329.33    | 176.67         | 238.00        |
| rno-miR-19a-3p  | 54.00     | 62.52          | 86.67     | 18.37          | 22.67     | 58.00      | 29.67         | 62.67         | 70.33     | 89.00     | 32.00          | 65.33         |
| rno-miR-130a-3p | 76.33     | 94.25          | 90.67     | 51.27          | 67.33     | 85.00      | 61.67         | 76.67         | 88.33     | 87.67     | 77.33          | 104.33        |
| rno-miR-3590-5p | 76.33     | 94.25          | 90.67     | 51.27          | 67.33     | 85.00      | 61.67         | 76.67         | 88.33     | 87.67     | 77.33          | 104.33        |

---

|                   |         |         |         |         |         |         |         |         |         |         |         |         |
|-------------------|---------|---------|---------|---------|---------|---------|---------|---------|---------|---------|---------|---------|
| rno-miR-203b-5p   | 2798.67 | 3085.61 | 3362.67 | 4594.62 | 3752.67 | 3249.33 | 2058.67 | 3388.67 | 3043.33 | 3056.00 | 1764.00 | 2892.33 |
| rno-miR-3065-5p   | 22.00   | 29.81   | 27.00   | 15.06   | 17.33   | 28.67   | 12.33   | 27.33   | 37.67   | 38.00   | 19.33   | 22.33   |
| rno-miR-338-3p    | 22.00   | 29.81   | 27.00   | 15.06   | 17.33   | 28.67   | 12.33   | 27.33   | 37.67   | 38.00   | 19.33   | 22.33   |
| rno-miR-1843a-5p  | 974.67  | 1044.50 | 1196.00 | 1512.91 | 1341.33 | 1174.67 | 918.33  | 1392.00 | 1495.00 | 1579.00 | 1235.00 | 1222.00 |
| rno-miR-107-3p    | 690.67  | 868.80  | 676.67  | 617.08  | 578.33  | 791.33  | 498.00  | 778.00  | 814.67  | 1045.67 | 606.67  | 877.33  |
| rno-miR-203a-3p   | 4105.33 | 4763.84 | 5281.33 | 6758.27 | 5787.67 | 4946.33 | 3118.00 | 5487.67 | 4847.67 | 4721.67 | 2681.33 | 4344.00 |
| rno-miR-144-3p    | 137.00  | 116.69  | 222.67  | 59.58   | 134.67  | 377.67  | 139.33  | 157.00  | 155.00  | 316.45  | 219.33  | 183.67  |
| rno-miR-181a-1-3p | 75.33   | 105.57  | 158.33  | 170.73  | 142.67  | 117.00  | 91.33   | 130.67  | 111.00  | 119.33  | 118.33  | 105.00  |
| rno-miR-3570      | 75.33   | 105.57  | 158.33  | 170.73  | 142.67  | 117.00  | 91.33   | 130.67  | 111.00  | 119.33  | 118.33  | 105.00  |
| rno-miR-181a-2-3p | 13.33   | 8.94    | 11.67   | 20.01   | 10.00   | 7.00    | 11.67   | 15.33   | 15.00   | 11.67   | 15.67   | 9.67    |
| rno-miR-3120      | 30.67   | 48.06   | 53.67   | 26.48   | 33.67   | 61.00   | 42.33   | 51.00   | 43.33   | 55.67   | 64.33   | 51.67   |
| rno-miR-19b-3p    | 761.00  | 995.54  | 802.67  | 539.22  | 497.33  | 997.67  | 527.67  | 852.00  | 715.33  | 1114.33 | 453.00  | 923.67  |
| rno-miR-653-5p    | 1.33    | 0.00    | 1.67    | 2.81    | 0.67    | 1.33    | 1.00    | 1.00    | 1.33    | 0.67    | 0.67    | 0.33    |

---

---

|                  |         |         |         |         |         |         |         |         |         |         |         |         |
|------------------|---------|---------|---------|---------|---------|---------|---------|---------|---------|---------|---------|---------|
| rno-miR-362-3p   | 113.00  | 131.72  | 102.67  | 78.52   | 71.67   | 113.33  | 54.64   | 95.33   | 85.33   | 159.67  | 67.00   | 135.67  |
| rno-miR-186-5p   | 1673.33 | 2332.57 | 1910.00 | 1567.44 | 1136.86 | 2664.33 | 1186.67 | 1822.67 | 2018.67 | 2830.67 | 1620.00 | 2258.67 |
| rno-miR-15a-3p   | 0.33    | 2.43    | 0.00    | 0.00    | 0.33    | 0.33    | 0.33    | 0.67    | 0.67    | 0.00    | 0.67    | 0.67    |
| rno-miR-33-5p    | 22.33   | 17.75   | 7.67    | 5.61    | 7.00    | 9.67    | 4.33    | 12.00   | 19.00   | 20.00   | 7.67    | 13.67   |
| rno-miR-1843b-5p | 169.00  | 176.26  | 192.67  | 240.11  | 208.67  | 206.00  | 158.33  | 226.67  | 237.67  | 282.33  | 222.33  | 214.00  |
| rno-miR-378b     | 8.33    | 11.23   | 15.67   | 111.33  | 199.71  | 101.00  | 243.52  | 13.00   | 17.00   | 18.33   | 23.67   | 14.00   |
| rno-miR-542-3p   | 909.67  | 799.28  | 1376.00 | 1201.67 | 1597.65 | 1028.00 | 846.00  | 1135.67 | 1109.33 | 1209.33 | 1076.67 | 1229.67 |
| rno-miR-203a-5p  | 637.33  | 648.07  | 886.33  | 1303.67 | 1465.35 | 783.00  | 572.67  | 839.33  | 918.67  | 792.00  | 526.33  | 952.67  |
| novel_536        | 49.33   | 114.89  | 21.33   | 46.67   | 30.02   | 28.00   | 43.33   | 80.00   | 39.33   | 124.33  | 33.33   | 50.67   |
| rno-miR-203b-3p  | 825.33  | 838.41  | 1150.33 | 1635.67 | 1740.82 | 989.67  | 705.00  | 1096.00 | 1210.67 | 1026.67 | 681.67  | 1222.00 |
| rno-miR-421-3p   | 5.00    | 2.81    | 5.67    | 4.33    | 5.67    | 12.86   | 5.00    | 5.00    | 5.00    | 6.67    | 8.33    | 7.00    |
| rno-miR-93-3p    | 5.33    | 3.94    | 9.67    | 11.67   | 8.33    | 15.40   | 6.67    | 6.00    | 7.33    | 8.67    | 10.67   | 6.67    |
| rno-miR-98-3p    | 2.00    | 3.50    | 2.00    | 1.67    | 1.67    | 0.34    | 1.33    | 2.00    | 1.67    | 2.00    | 2.33    | 4.15    |
| rno-miR-106b-3p  | 192.67  | 248.53  | 354.33  | 450.33  | 367.67  | 532.00  | 499.01  | 332.33  | 329.33  | 359.33  | 556.00  | 328.33  |

---

---

|                 |         |         |         |         |         |         |         |         |          |          |         |         |
|-----------------|---------|---------|---------|---------|---------|---------|---------|---------|----------|----------|---------|---------|
| rno-miR-490-3p  | 18.33   | 20.60   | 13.33   | 21.67   | 25.00   | 23.00   | 8.74    | 13.67   | 22.33    | 27.67    | 20.67   | 20.67   |
| rno-miR-96-5p   | 203.33  | 238.69  | 148.67  | 188.67  | 166.67  | 335.67  | 102.21  | 152.00  | 446.33   | 289.33   | 277.33  | 149.67  |
| rno-miR-429     | 188.33  | 339.16  | 441.33  | 338.00  | 419.00  | 535.00  | 336.33  | 236.61  | 393.67   | 467.33   | 352.33  | 504.33  |
| rno-miR-148a-5p | 4487.00 | 6030.83 | 8861.67 | 8273.00 | 7145.67 | 7050.67 | 6889.00 | 9719.31 | 11180.73 | 10375.67 | 6962.00 | 7855.67 |
| rno-miR-31a-3p  | 116.00  | 109.54  | 127.33  | 172.67  | 176.33  | 156.67  | 109.67  | 178.65  | 174.00   | 170.33   | 113.00  | 174.33  |
| rno-miR-217-5p  | 15.33   | 13.29   | 29.33   | 12.33   | 23.00   | 124.00  | 23.33   | 4.47    | 6.00     | 13.33    | 19.00   | 14.00   |
| rno-miR-183-5p  | 276.67  | 314.03  | 213.67  | 403.00  | 384.33  | 407.67  | 188.00  | 267.00  | 575.28   | 388.00   | 539.33  | 233.33  |
| rno-miR-3553    | 276.67  | 314.03  | 213.67  | 403.00  | 384.33  | 407.67  | 188.00  | 267.00  | 575.28   | 388.00   | 539.33  | 233.33  |
| rno-miR-7b      | 14.33   | 19.00   | 26.00   | 27.33   | 24.67   | 27.67   | 21.00   | 31.33   | 40.86    | 32.00    | 33.33   | 20.67   |
| rno-miR-98-5p   | 328.00  | 406.49  | 390.33  | 423.33  | 307.00  | 602.00  | 340.67  | 355.33  | 282.21   | 400.67   | 285.00  | 323.00  |
| rno-miR-182     | 1095.33 | 1186.15 | 810.00  | 1458.67 | 1487.33 | 1220.33 | 709.33  | 970.00  | 1722.14  | 1135.00  | 1464.67 | 892.00  |
| rno-miR-200c-3p | 76.33   | 103.43  | 112.33  | 89.33   | 55.33   | 154.33  | 56.00   | 70.00   | 70.33    | 55.17    | 87.00   | 51.08   |
| rno-miR-379-5p  | 10.33   | 15.73   | 21.33   | 9.33    | 8.33    | 26.00   | 4.00    | 14.33   | 13.67    | 4.17     | 7.67    | 6.67    |
| rno-miR-200b-3p | 2283.67 | 5447.73 | 5296.33 | 5120.33 | 3902.33 | 5683.67 | 4797.33 | 3779.67 | 3540.67  | 3445.98  | 3953.33 | 4611.33 |

---

---

|                  |        |        |         |         |         |         |         |        |        |        |         |        |
|------------------|--------|--------|---------|---------|---------|---------|---------|--------|--------|--------|---------|--------|
| rno-miR-411-5p   | 5.33   | 4.83   | 6.33    | 3.33    | 2.00    | 4.33    | 2.67    | 5.67   | 3.67   | 0.83   | 2.00    | 1.33   |
| rno-miR-6216     | 21.33  | 38.28  | 48.33   | 37.67   | 31.00   | 40.67   | 22.67   | 32.67  | 32.00  | 15.82  | 68.67   | 23.67  |
| rno-miR-484      | 7.67   | 4.17   | 7.00    | 11.33   | 7.33    | 11.00   | 8.33    | 8.00   | 9.00   | 12.94  | 15.56   | 9.67   |
| rno-miR-1b       | 784.33 | 896.10 | 1266.33 | 1897.33 | 1142.00 | 2594.67 | 3693.67 | 488.00 | 604.00 | 283.46 | 1011.67 | 276.67 |
| rno-miR-127-3p   | 37.00  | 50.89  | 76.33   | 56.67   | 45.67   | 94.67   | 31.67   | 57.00  | 60.00  | 26.94  | 72.33   | 27.33  |
| rno-miR-92b-3p   | 2.00   | 10.22  | 3.00    | 3.00    | 3.33    | 4.67    | 3.33    | 4.00   | 4.33   | 5.00   | 10.22   | 2.00   |
| rno-miR-138-1-3p | 1.33   | 3.03   | 1.00    | 1.33    | 1.33    | 1.33    | 0.33    | 0.00   | 1.33   | 0.33   | 3.03    | 3.33   |
| rno-miR-3574     | 313.33 | 216.37 | 322.67  | 365.67  | 259.00  | 372.33  | 302.33  | 362.33 | 325.67 | 603.67 | 216.37  | 361.67 |
| rno-miR-342-5p   | 4.33   | 9.22   | 6.67    | 2.00    | 2.67    | 3.67    | 3.00    | 3.33   | 2.00   | 2.33   | 9.22    | 3.33   |
| rno-miR-210-3p   | 314.00 | 217.09 | 322.67  | 366.00  | 259.00  | 372.67  | 303.33  | 362.33 | 326.67 | 604.67 | 217.09  | 361.67 |
| rno-miR-99a-3p   | 47.67  | 31.19  | 50.33   | 81.33   | 63.33   | 60.00   | 45.00   | 79.67  | 74.67  | 81.00  | 31.19   | 54.67  |
| rno-miR-138-1-3p | 1.33   | 0.00   | 1.00    | 1.33    | 1.33    | 1.33    | 0.33    | 0.00   | 1.33   | 0.33   | 3.00    | 3.27   |
| rno-miR-150-3p   | 4.67   | 14.07  | 8.33    | 11.00   | 8.33    | 7.33    | 6.33    | 11.67  | 8.67   | 13.67  | 17.67   | 5.80   |



|                  |         |         |         |         |         |         |         |         |         |         |         |         |
|------------------|---------|---------|---------|---------|---------|---------|---------|---------|---------|---------|---------|---------|
| rno-miR-1843a-3p | 32.00   | 37.48   | 48.00   | 61.00   | 39.67   | 57.67   | 34.67   | 46.33   | 46.00   | 71.67   | 85.00   | 59.89   |
| rno-miR-582-5p   | 5.67    | 10.70   | 11.00   | 8.67    | 5.67    | 8.67    | 8.33    | 6.33    | 6.33    | 9.33    | 4.00    | 4.15    |
| rno-miR-547-5p   | 1.33    | 2.49    | 0.67    | 2.00    | 0.00    | 1.67    | 1.00    | 2.00    | 0.67    | 1.00    | 2.00    | 0.00    |
| rno-miR-122-3p   | 2113.33 | 2676.75 | 3290.33 | 3446.33 | 3122.67 | 2985.00 | 2737.67 | 3226.00 | 3063.00 | 3416.00 | 2797.67 | 3700.92 |

---

**Supplementary Table 8.** Groups of 11 miRNAs that are significantly different from the MOD group

| <b>miRNA</b> | <b>TEST</b> |
|--------------|-------------|
| miR-19a-3p   | PSF.M       |
| miR-21-3p    | PSF.M       |
| miR-142-3p   | PSF.M       |
| miR-1247-3p  | PSF.M       |
| miR-200a-5p  | CON         |
| miR-3548     | CON         |
| miR-122-5p   | PSF.L       |
| miR-451-5p   | PSF.L       |
| miR-378b     | PS.M        |
| miR-184      | PWE.M       |
| miR-484      | PWE.H       |

**Supplementary Table 9.** Three software predicts the correspondence between the analyzed miRNA and the target gene (partial).

| Target::miRNA                       | RNAhybrid | PITA | miRanda |
|-------------------------------------|-----------|------|---------|
| ENSRNOT00000000008::rno-miR-101a-3p | 0         | 0    | 1       |
| ENSRNOT00000000008::rno-miR-124-5p  | 0         | 0    | 1       |
| ENSRNOT00000000008::rno-miR-150-3p  | 1         | 0    | 0       |
| ENSRNOT00000000008::rno-miR-188-5p  | 1         | 1    | 0       |
| ENSRNOT00000000008::rno-miR-350     | 0         | 1    | 1       |
| ENSRNOT00000000008::rno-miR-3541    | 0         | 1    | 0       |
| ENSRNOT00000000008::rno-miR-674-5p  | 1         | 1    | 0       |
| ENSRNOT00000000008::rno-miR-872-3p  | 0         | 1    | 0       |
| ENSRNOT00000000009::novel_392       | 1         | 0    | 0       |
| ENSRNOT00000000010::novel_549       | 1         | 0    | 0       |
| ENSRNOT00000000008::novel_150       | 0         | 0    | 1       |
| ENSRNOT00000000008::novel_183       | 0         | 1    | 0       |
| ENSRNOT00000000008::novel_239       | 0         | 1    | 0       |
| ENSRNOT00000000008::novel_226       | 1         | 1    | 0       |

Note: 0 means unpredicted, 1 means predicted.

**Supplementary Table 10.** Gene Ontology Enrichment List of Candidate Target Genes in Samples (Partial)

| GO_accession | Description                                         | P-value     |
|--------------|-----------------------------------------------------|-------------|
| GO:0044241   | lipid digestion                                     | 0.000894620 |
| GO:0036146   | cellular response to mycotoxin                      | 0.000018207 |
| GO:0009137   | purine nucleoside diphosphate catabolic process     | 0.000025044 |
| GO:0009191   | ribonucleoside diphosphate catabolic process        | 0.000062470 |
| GO:0009155   | purine deoxyribonucleotide catabolic process        | 0.000062470 |
| GO:0009181   | purine ribonucleoside diphosphate catabolic process | 0.000062119 |
| GO:0009134   | nucleoside diphosphate catabolic process            | 0.000087353 |
| GO:0009151   | purine deoxyribonucleotide metabolic process        | 0.000186490 |
| GO:0046386   | deoxyribose phosphate catabolic process             | 0.000227640 |
| GO:0009264   | deoxyribonucleotide catabolic process               | 0.000272820 |
| GO:0016077   | snoRNA catabolic process                            | 0.002071700 |
| GO:0072237   | metanephric proximal tubule development             | 0.006202600 |
| GO:0006195   | purine nucleotide catabolic process                 | 0.006457100 |
| GO:0060548   | negative regulation of cell death                   | 0.006619600 |
| GO:0034314   | Arp2/3 complex-mediated actin nucleation            | 0.007808700 |
| GO:0060587   | regulation of lipoprotein lipid oxidation           | 0.008186600 |
| GO:0034439   | lipoprotein lipid oxidation                         | 0.008186600 |
| GO:0001635   | calcitonin gene-related peptide receptor activity   | 0.008231000 |
| GO:1902463   | protein localization to cell leading edge           | 0.008564900 |
| GO:2001025   | positive regulation of response to drug             | 0.008564900 |

---

|            |                          |             |
|------------|--------------------------|-------------|
| GO:0015670 | carbon dioxide transport | 0.010317000 |
| GO:0043029 | T cell homeostasis       | 0.015289000 |
| GO:0090130 | tissue migration         | 0.040841000 |

---

**Supplementary Table 11.** Regulation of Intestinal Microbial Composition of Rats with Abnormal Lipid Metabolism (abundance)

|                                         | CON        | MOD       | PSF.L     | PSF.M       | PSF.H     | PS.L      | PS.M      | PS.H      | WE.L        | WE.M      | WE.H        | SIM        |
|-----------------------------------------|------------|-----------|-----------|-------------|-----------|-----------|-----------|-----------|-------------|-----------|-------------|------------|
| <i>Alloprevotella</i>                   | 0.24±0.00  | 0.12±0.00 | 0.12±0.00 | 0.21±0.00   | 0.06±0.00 | 0.07±0.00 | 0.05±0.00 | 0.07±0.00 | 0.44±0.00** | 0.26±0.00 | 0.18±0.00   | 0.14±0.00  |
| <i>Allobaculum</i>                      | 0.71±0.00  | 0.53±0.00 | 0.59±0.00 | 0.44±0.00   | 0.39±0.00 | 0.64±0.00 | 0.83±0.01 | 0.79±0.00 | 0.57±0.00   | 0.64±0.00 | 0.84±0.00*  | 0.75±0.00  |
| <i>Bacteroides</i>                      | 2.65±0.02  | 2.34±0.01 | 2.12±0.01 | 6.65±0.03** | 3.35±0.00 | 3.42±0.01 | 2.59±0.01 | 3.10±0.01 | 2.76±0.01   | 2.76±0.01 | 5.61±0.02*  | 2.05±0.01  |
| <i>Blautia</i>                          | 0.77±0.00  | 0.62±0.00 | 0.87±0.00 | 1.27±0.00   | 0.73±0.00 | 1.23±0.01 | 1.40±0.01 | 1.52±0.00 | 0.67±0.00   | 1.12±0.00 | 2.08±0.00*  | 1.16±0.00  |
| <i>Bacillus</i>                         | 0.59±0.00  | 0.65±0.00 | 0.62±0.00 | 0.91±0.00   | 1.66±0.01 | 0.47±0.00 | 0.55±0.00 | 0.29±0.00 | 0.27±0.00   | 0.34±0.00 | 0.67±0.00   | 0.35±0.00  |
| <i>Clostridium sensu stricto_1</i>      | 1.45±0.00  | 1.26±0.00 | 1.64±0.00 | 1.44±0.00   | 2.78±0.02 | 0.71±0.01 | 0.60±0.01 | 0.09±0.00 | 0.11±0.00   | 0.11±0.00 | 1.21±0.00   | 1.06±0.01  |
| <i>Christensenellaceae_R-7</i>          | 0.39±0.00* | 0.61±0.00 | 0.46±0.00 | 0.42±0.00*  | 0.44±0.00 | 0.52±0.00 | 0.58±0.00 | 0.59±0.00 | 0.35±0.00*  | 0.45±0.00 | 0.29±0.00** | 0.39±0.00* |
| <i>Coprococcus_1</i>                    | 0.20±0.00  | 0.17±0.00 | 0.18±0.00 | 0.21±0.00   | 0.15±0.00 | 0.17±0.00 | 0.19±0.00 | 0.20±0.00 | 0.15±0.00   | 0.20±0.00 | 0.24±0.00   | 0.22±0.00  |
| <i>Desulfovibrio</i>                    | 0.40±0.00  | 0.62±0.00 | 0.59±0.00 | 0.79±0.00   | 0.85±0.00 | 0.95±0.01 | 0.71±0.00 | 0.67±0.00 | 0.72±0.00   | 1.01±0.00 | 0.57±0.00   | 0.53±0.00  |
| <i>[Eubacterium]_rumi nantium</i>       | 0.26±0.00  | 0.14±0.00 | 0.33±0.00 | 0.13±0.00   | 0.09±0.00 | 0.19±0.00 | 0.17±0.00 | 0.11±0.00 | 0.16±0.00   | 0.14±0.00 | 0.25±0.00   | 0.56±0.00* |
| <i>[Eubacterium]_copr ostanoligenes</i> | 0.57±0.00  | 0.81±0.00 | 0.73±0.00 | 0.74±0.00   | 0.79±0.00 | 0.69±0.00 | 0.91±0.00 | 0.77±0.00 | 0.55±0.00   | 0.60±0.00 | 0.79±0.00   | 0.82±0.00  |

|                                    |             |            |             |             |                  |            |             |                  |                  |                  |             |             |
|------------------------------------|-------------|------------|-------------|-------------|------------------|------------|-------------|------------------|------------------|------------------|-------------|-------------|
| <i>Helicobacter</i>                | 0.32±0.00   | 0.17±0.00  | 0.52±0.00*  | 0.31±0.00   | 0.42±0.00        | 0.24±0.00  | 0.37±0.00   | 0.30±0.00        | 0.44±0.00        | 0.54±0.00*       | 0.43±0.00   | 0.60±0.00*  |
| <i>Lactobacillus</i>               | 11.54±0.02* | 15.08±0.02 | 8.67±0.01** | 8.72±0.01** | 7.40±0.02**<br>* | 12.08±0.03 | 9.77±0.03** | 7.89±0.02**<br>* | 5.60±0.03**<br>* | 5.99±0.01**<br>* | 8.25±0.01** | 9.41±0.03** |
| <i>Lachnospiraceae_N</i><br>K4A136 | 4.97±0.01   | 4.05±0.01  | 5.26±0.01   | 3.70±0.00   | 4.44±0.01        | 4.49±0.02  | 3.72±0.01   | 2.59±0.00        | 3.26±0.01        | 4.19±0.02        | 3.03±0.00   | 5.13±0.01   |
| <i>Roseburia</i>                   | 1.41±0.00   | 1.02±0.00  | 1.76±0.01   | 2.56±0.01   | 1.90±0.01        | 1.66±0.00  | 1.79±0.00   | 1.95±0.01        | 1.83±0.01        | 4.25±0.00**      | 3.63±0.01*  | 2.37±0.00   |
| <i>Ruminococcus_1</i>              | 2.79±0.01   | 2.73±0.00  | 2.82±0.00   | 2.09±0.01*  | 1.74±0.00**      | 2.24±0.01  | 2.29±0.00   | 2.16±0.00        | 1.94±0.01*       | 1.88±0.00*       | 1.69±0.01** | 2.28±0.00   |
| <i>Ruminococcaceae_U</i><br>CG-014 | 1.87±0.01   | 1.76±0.00  | 2.25±0.00   | 1.69±0.01   | 1.71±0.00        | 1.80±0.00  | 2.26±0.00   | 1.93±0.00        | 1.66±0.00        | 1.71±0.00        | 1.93±0.00   | 1.93±0.00   |
| <i>Ruminiclostridium_9</i>         | 0.94±0.00   | 0.69±0.00  | 1.14±0.00   | 0.99±0.00   | 0.71±0.00        | 0.67±0.00  | 0.85±0.00   | 0.69±0.00        | 0.73±0.00        | 1.00±0.00        | 1.32±0.00   | 1.36±0.00   |
| <i>Ruminococcaceae_N</i><br>K4A214 | 0.55±0.00   | 0.66±0.00  | 0.60±0.00   | 0.54±0.00   | 0.48±0.00        | 0.58±0.00  | 0.65±0.00   | 0.64±0.00        | 0.52±0.00        | 0.56±0.00        | 0.54±0.00   | 0.66±0.00   |
| <i>Prevotella_9</i>                | 2.23±0.01   | 2.26±0.01  | 2.33±0.01   | 4.35±0.01   | 3.51±0.01        | 3.41±0.02  | 1.72±0.01   | 3.27±0.02        | 2.40±0.01        | 3.54±0.01        | 5.46±0.01*  | 2.65±0.02   |
| <i>Prevotellaceae_Ga6</i><br>A1    | 1.98±0.00   | 1.73±0.01  | 1.41±0.01   | 1.58±0.01   | 1.40±0.01        | 1.66±0.01  | 0.65±0.00   | 1.64±0.01        | 1.37±0.00        | 0.69±0.00        | 1.53±0.00   | 1.32±0.01   |
| <i>Pseudoxanthomonas</i>           | 0.13±0.00   | 0.23±0.00  | 0.18±0.00   | 0.15±0.00   | 1.21±0.01        | 0.12±0.00  | 0.07±0.00   | 0.02±0.00        | 0.04±0.00        | 0.01±0.00        | 0.14±0.00   | 0.13±0.00   |
| <i>Psychrobacter</i>               | 0.25±0.00*  | 0.57±0.00  | 0.27±0.00*  | 0.26±0.00*  | 0.23±0.00**      | 0.38±0.00  | 0.31±0.00** | 0.23±0.00**      | 0.39±0.00        | 0.22±0.00**      | 0.39±0.00   | 0.24±0.00** |
| <i>Parabacteroides</i>             | 0.20±0.00   | 0.22±0.00  | 0.24±0.00   | 0.33±0.00   | 0.26±0.00        | 0.42±0.00  | 0.29±0.00   | 0.36±0.00        | 0.28±0.00        | 0.29±0.00        | 0.30±0.00   | 0.23±0.00   |

---

|                         |           |           |           |           |           |           |           |           |            |            |           |           |
|-------------------------|-----------|-----------|-----------|-----------|-----------|-----------|-----------|-----------|------------|------------|-----------|-----------|
| <i>Sutterella</i>       | 0.16±0.00 | 0.26±0.00 | 0.19±0.00 | 0.24±0.00 | 0.23±0.00 | 0.36±0.00 | 0.41±0.00 | 0.39±0.00 | 0.25±0.00  | 0.33±0.00  | 0.30±0.00 | 0.20±0.00 |
| <i>Turicibacter</i>     | 0.57±0.00 | 0.47±0.00 | 0.56±0.00 | 0.63±0.00 | 1.16±0.01 | 0.27±0.00 | 0.25±0.00 | 0.16±0.00 | 0.15±0.00  | 0.22±0.00  | 0.53±0.00 | 0.41±0.00 |
| <i>Terrisporobacter</i> | 0.83±0.00 | 0.74±0.00 | 0.96±0.00 | 0.84±0.00 | 1.74±0.01 | 0.41±0.00 | 0.35±0.01 | 0.01±0.00 | 0.01±0.00  | 0.01±0.00  | 0.78±0.00 | 0.60±0.01 |
| <i>Thermobacillus</i>   | 0.23±0.00 | 0.15±0.00 | 0.16±0.00 | 0.29±0.00 | 0.31±0.00 | 0.07±0.00 | 0.05±0.00 | 0.00±0.00 | 0.00±0.00  | 0.01±0.00  | 0.23±0.00 | 0.08±0.00 |
| <i>Oscillibacter</i>    | 0.52±0.00 | 0.46±0.00 | 0.77±0.00 | 0.71±0.00 | 0.66±0.00 | 0.59±0.00 | 0.76±0.00 | 0.64±0.00 | 0.96±0.01* | 0.96±0.00* | 0.79±0.00 | 0.76±0.00 |

---

Note: \* P <0.05, \*\* P <0.01, \*\*\* P <0.001 compared with model group



## 1.2 Supplementary Figures

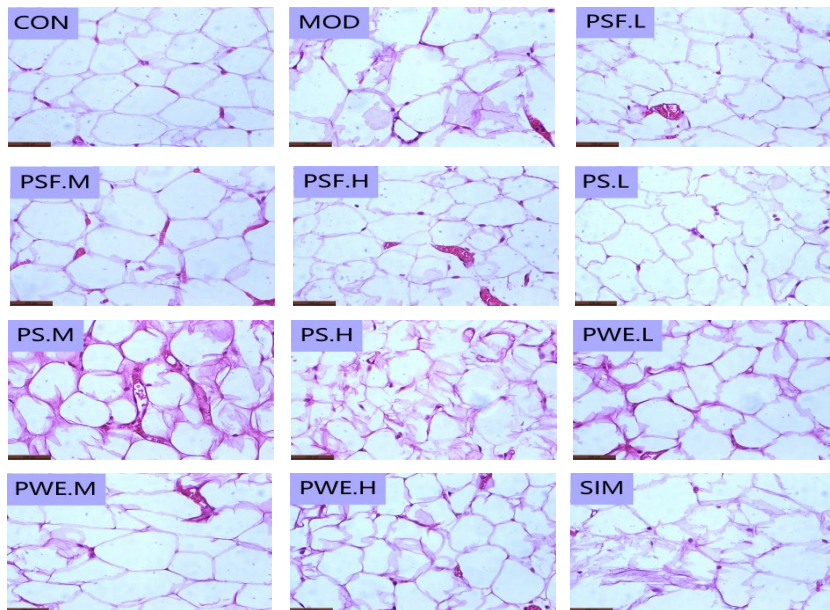

**Supplementary Figure 1-1.** HE staining of rat epididymal adipose tissue ( $\times 400$ )

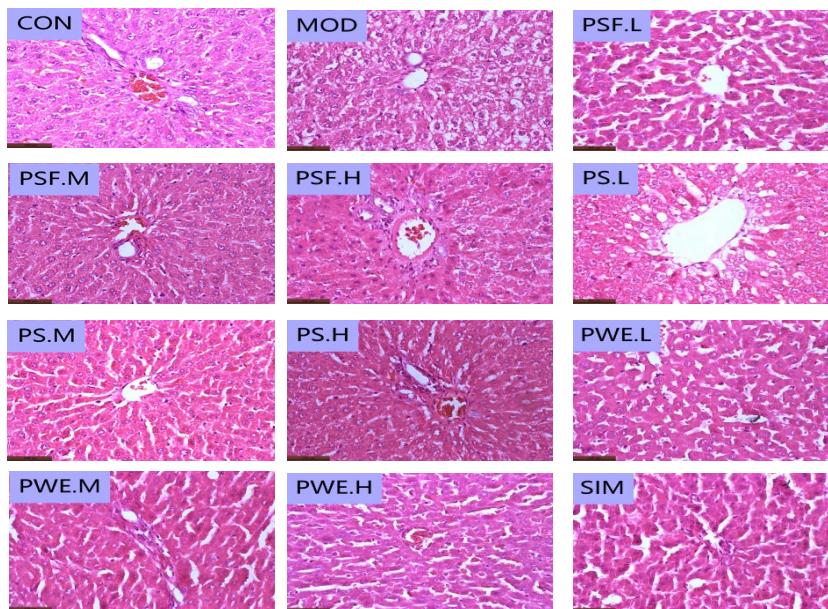

**Supplementary Figure 1-2.** HE staining of rat liver tissue ( $\times 200$ )

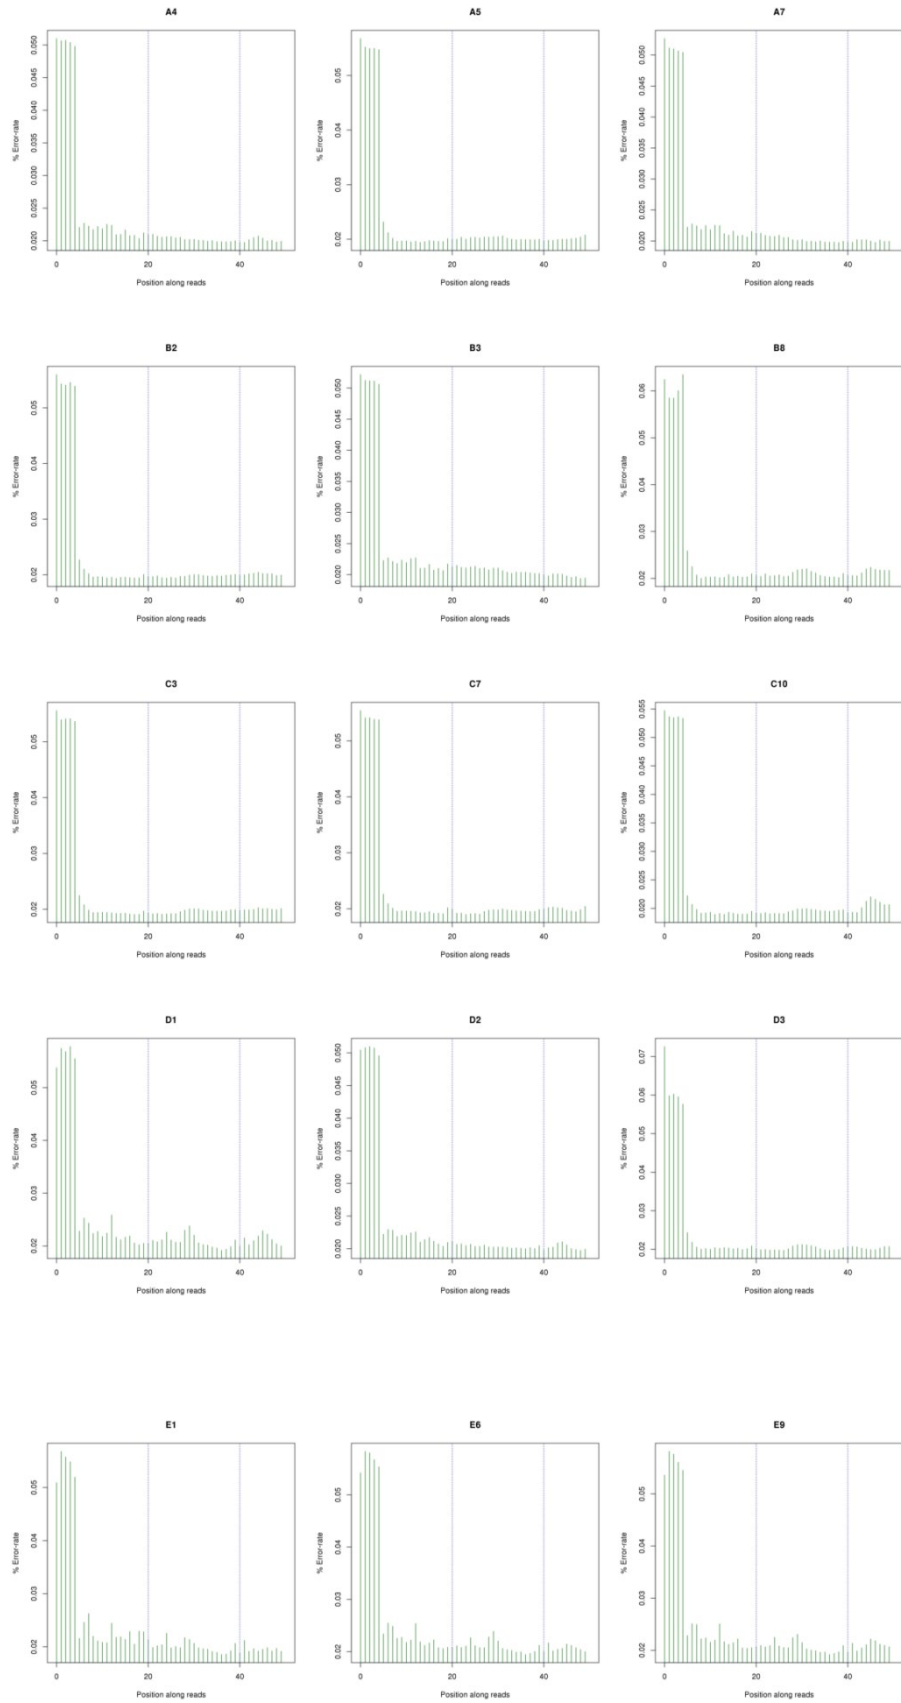

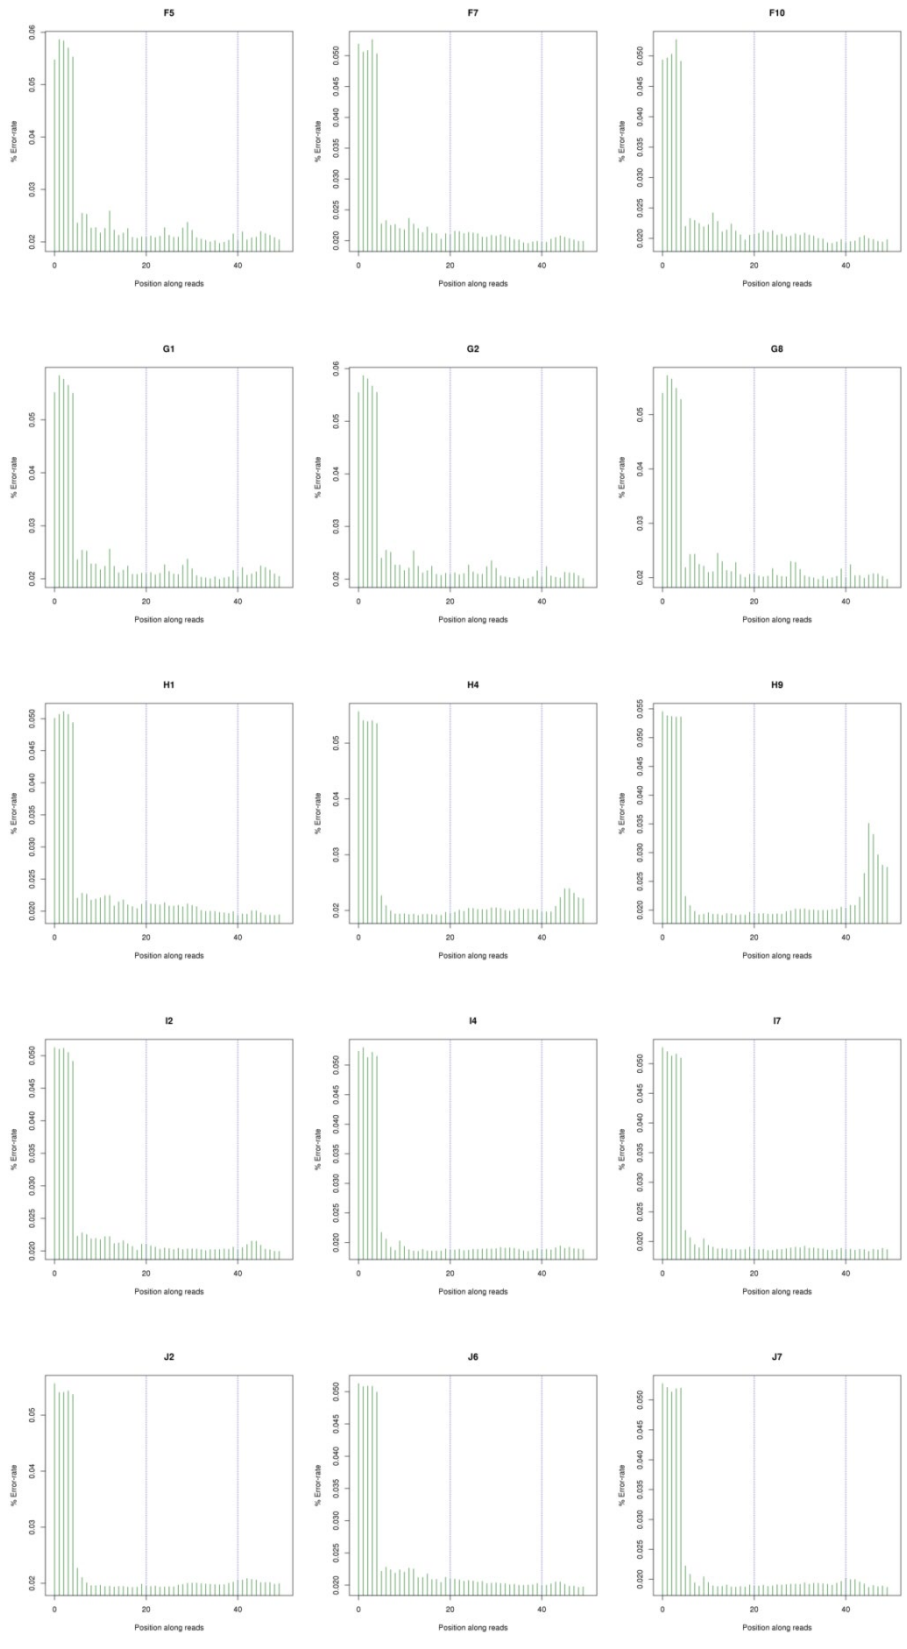

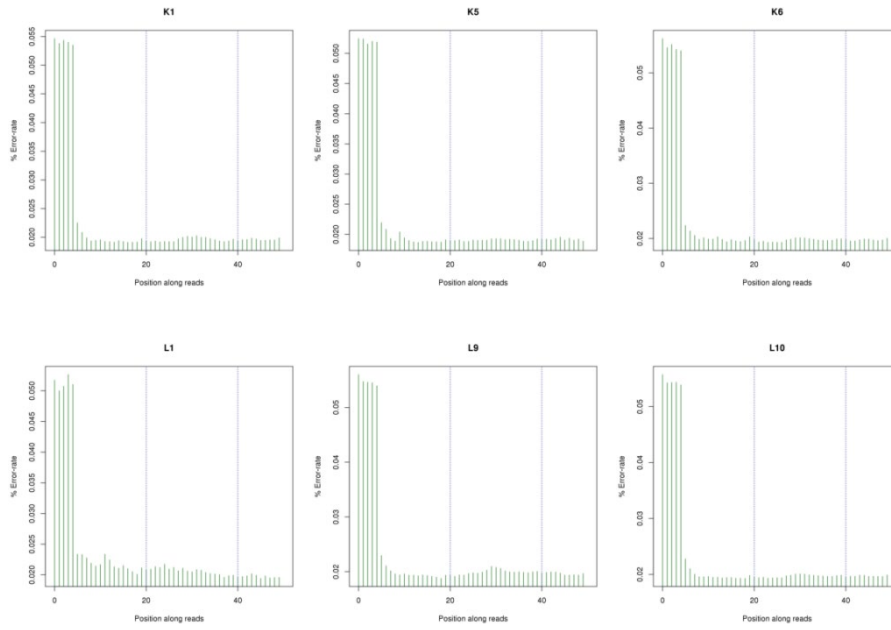

**Supplementary Figure 2.** Sequencing error rate distribution.

The abscissa is the base position of the reads, and the ordinate is the single base error rate

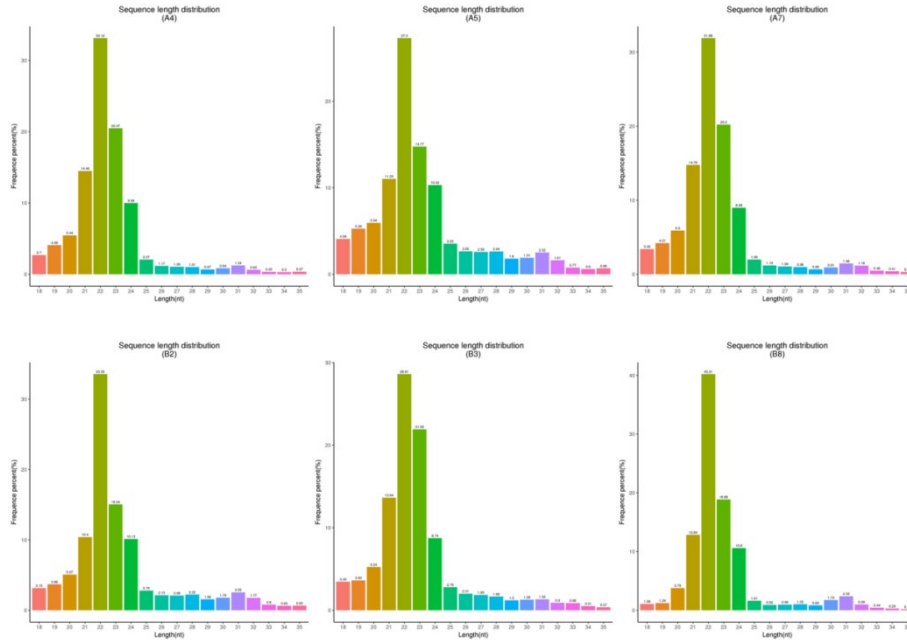

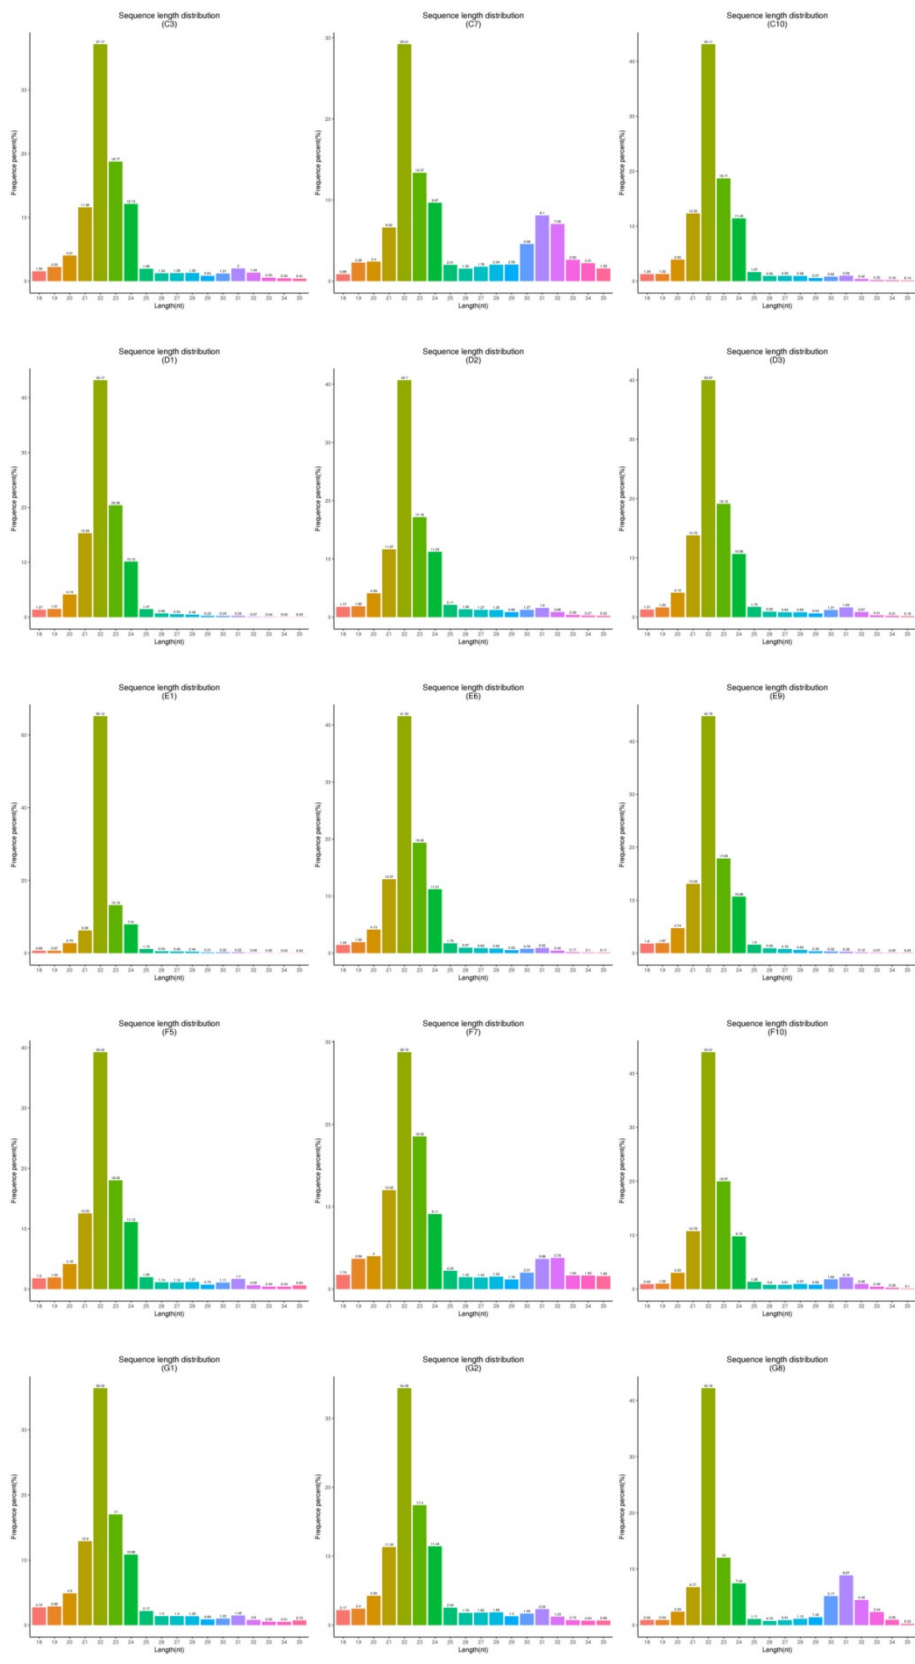

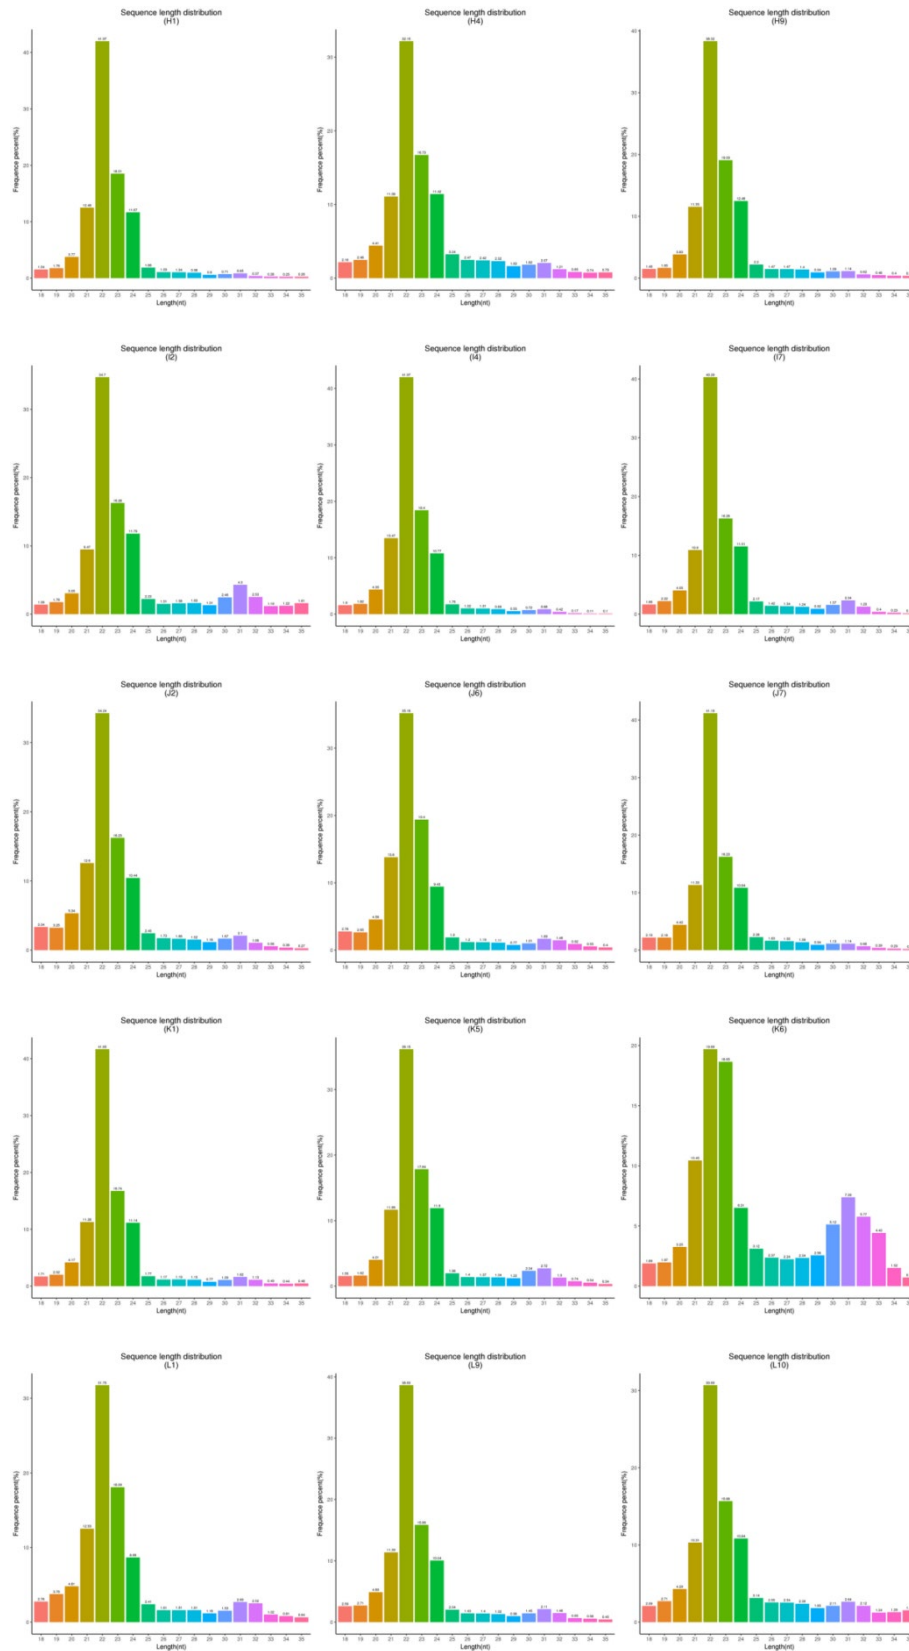

Supplementary Figure 3. Length distribution statistics of the obtained total sRNA fragments

The abscissa is the length of the reads, and the ordinate is the proportion of the reads of the length.

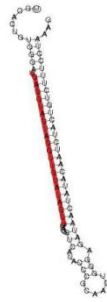

**Supplementary Figure 4. Secondary structure of known miRNAs on partial matches**

The entire sequence is the miRNA precursor, and the red highlight is the mature sequence.

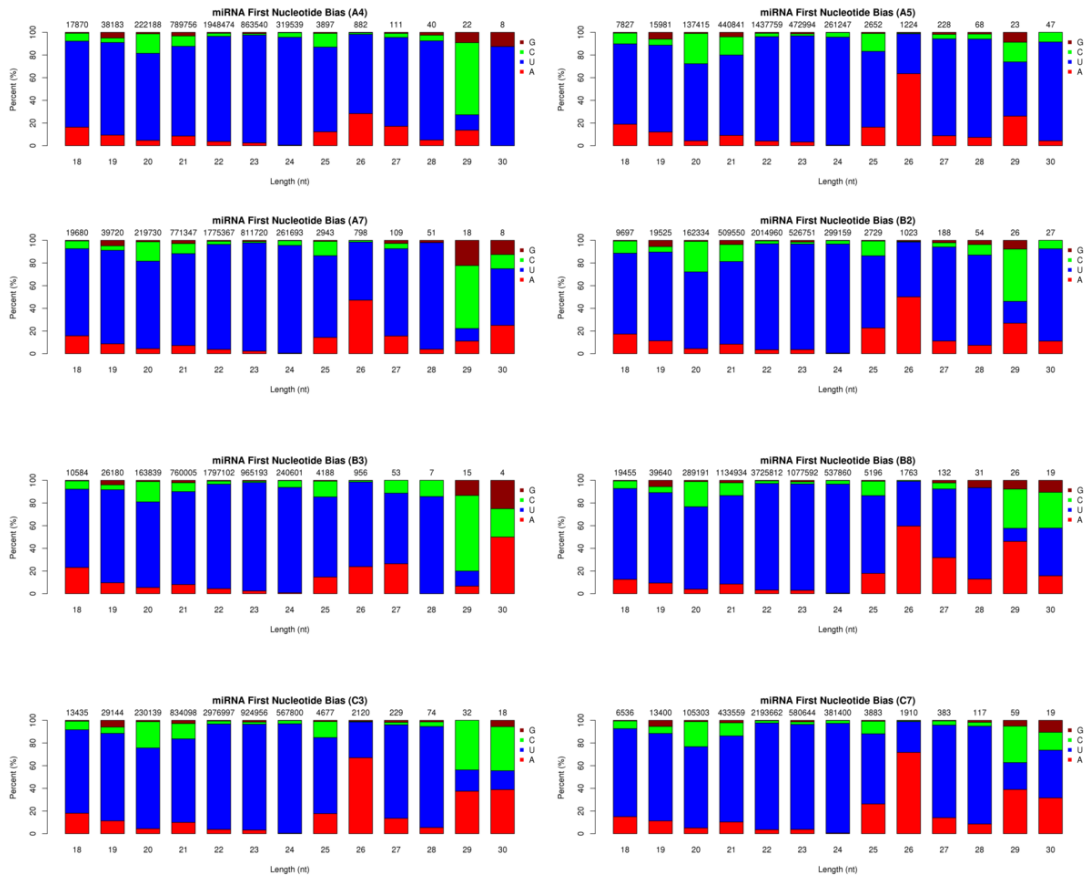

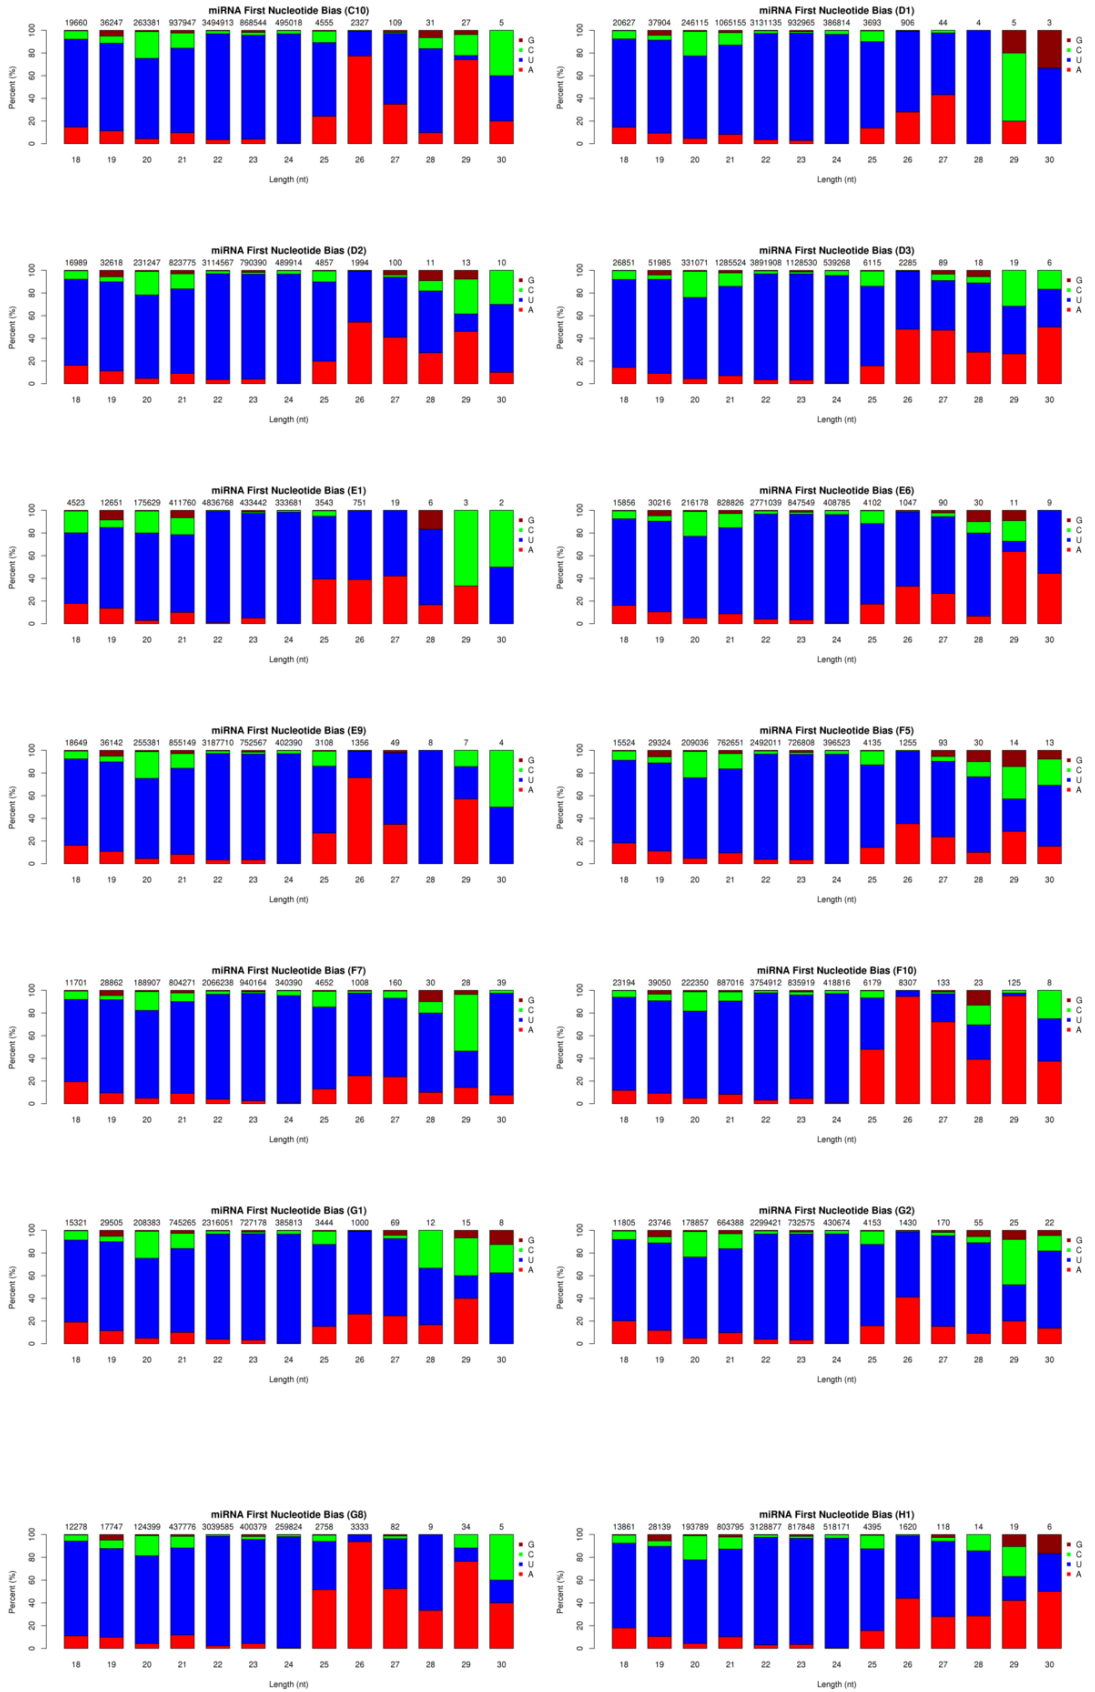



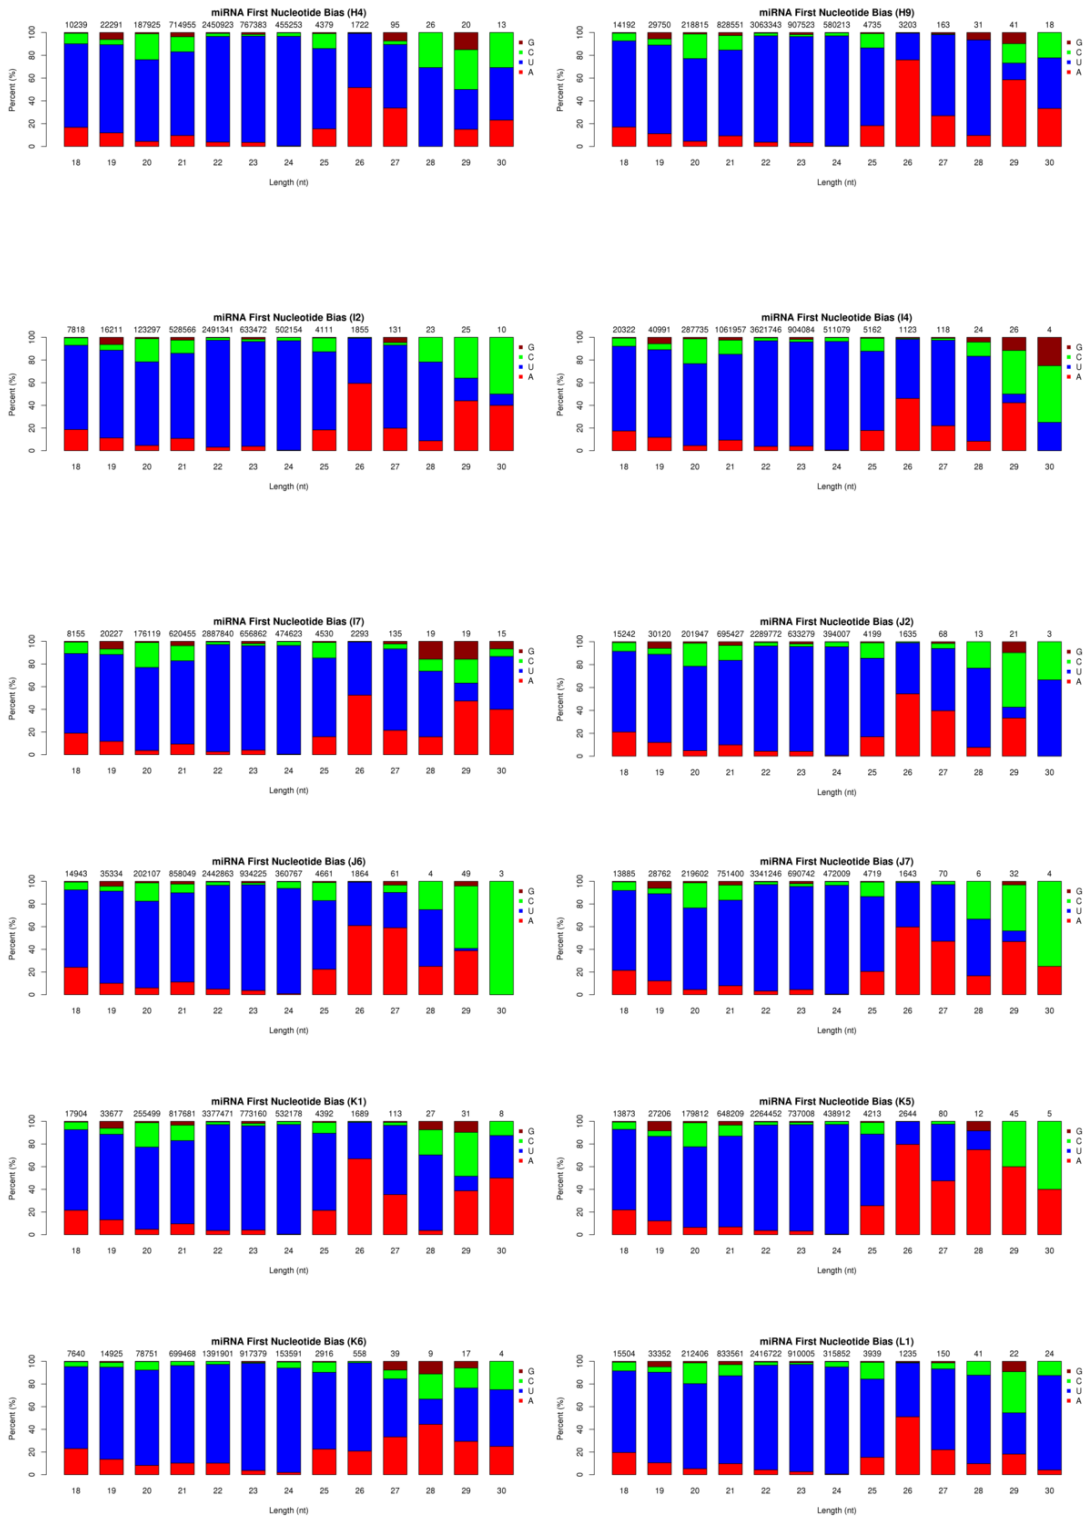

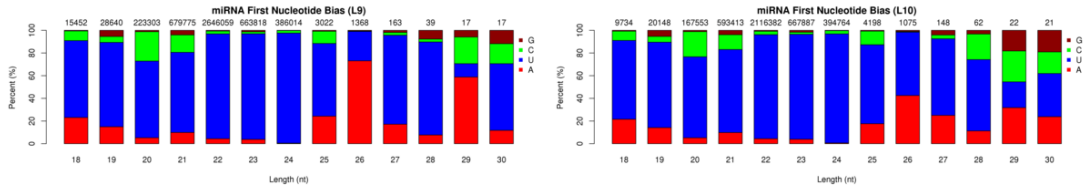

**Supplementary Figure 5. Known miRNA first base preference of 18~30nt in length**

The abscissa is the length of the miRNA, and the ordinate is the percentage of A/U/C/G in the first base of the miRNA in this length (the value above the histogram is the total number of miRNAs of this length)

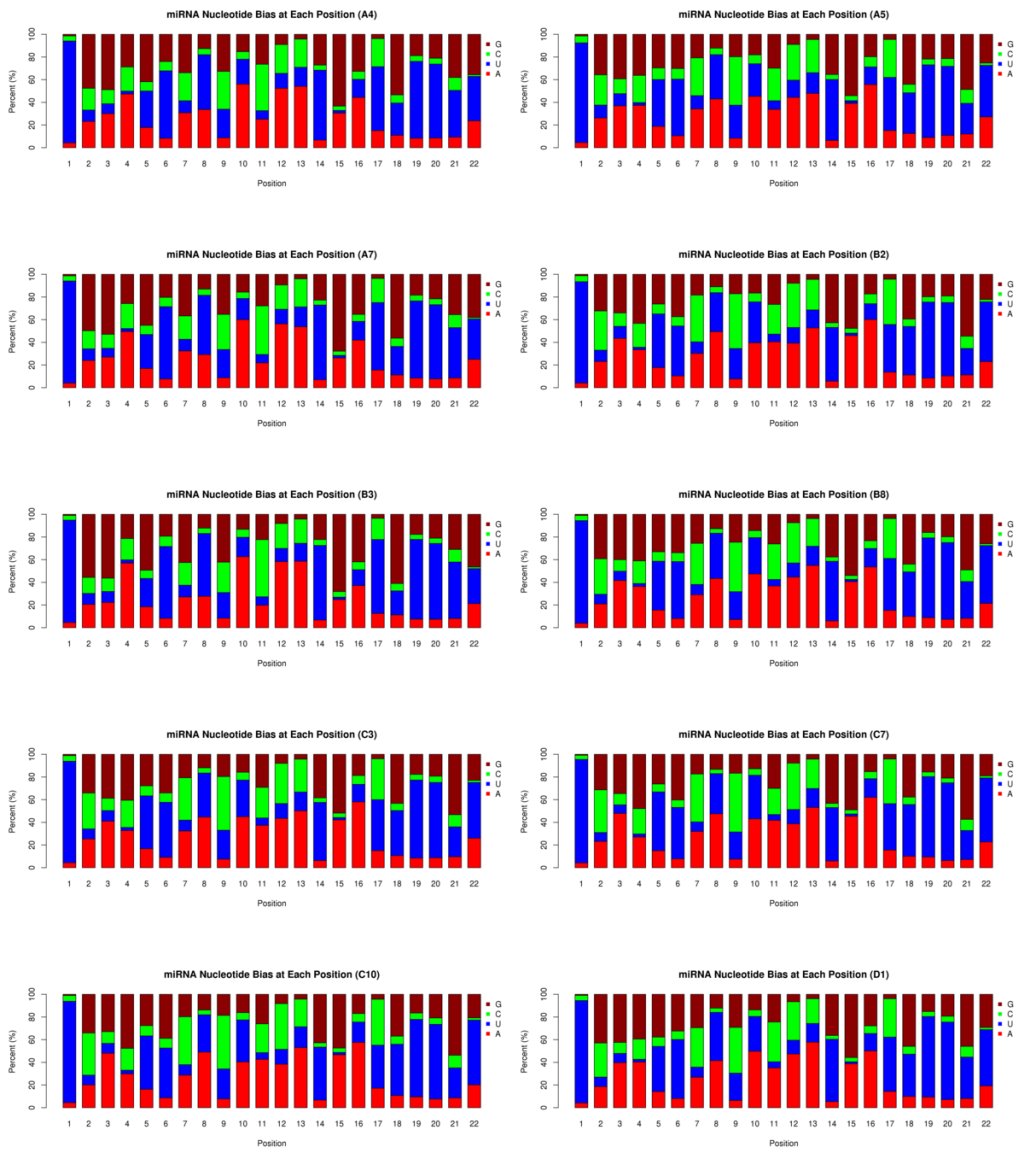

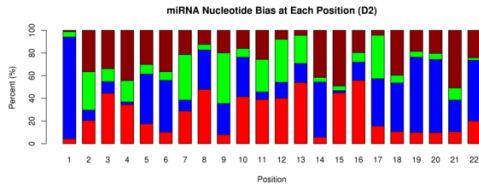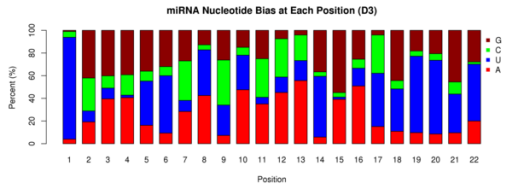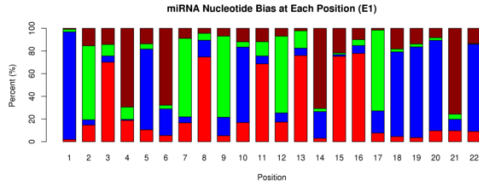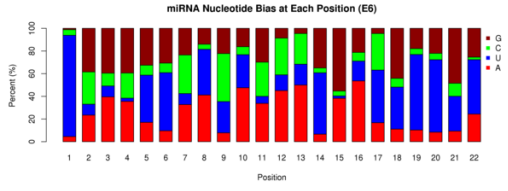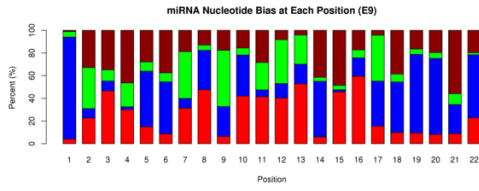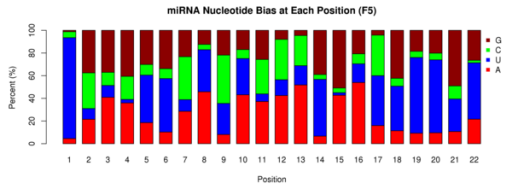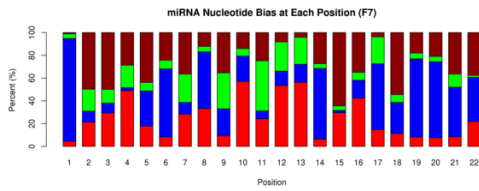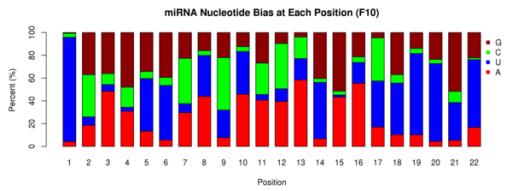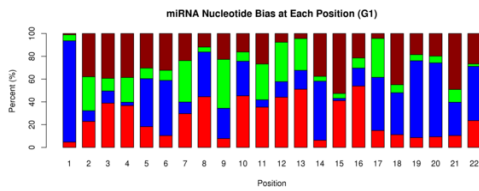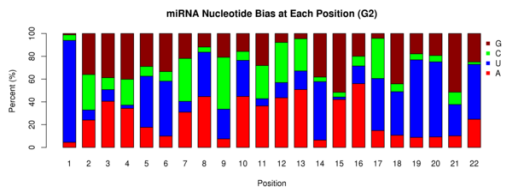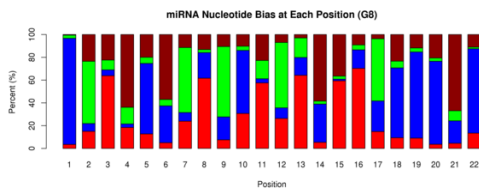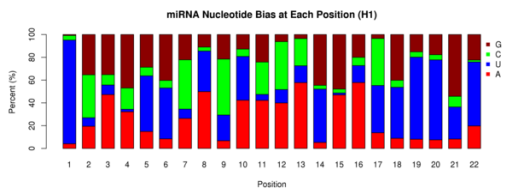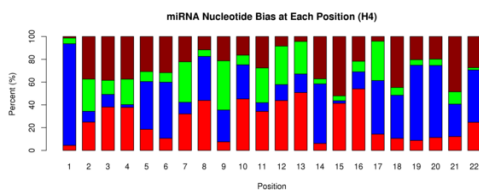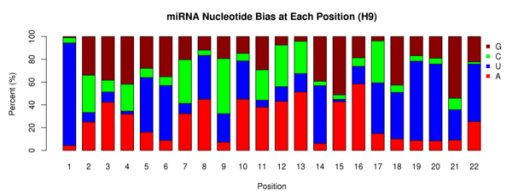

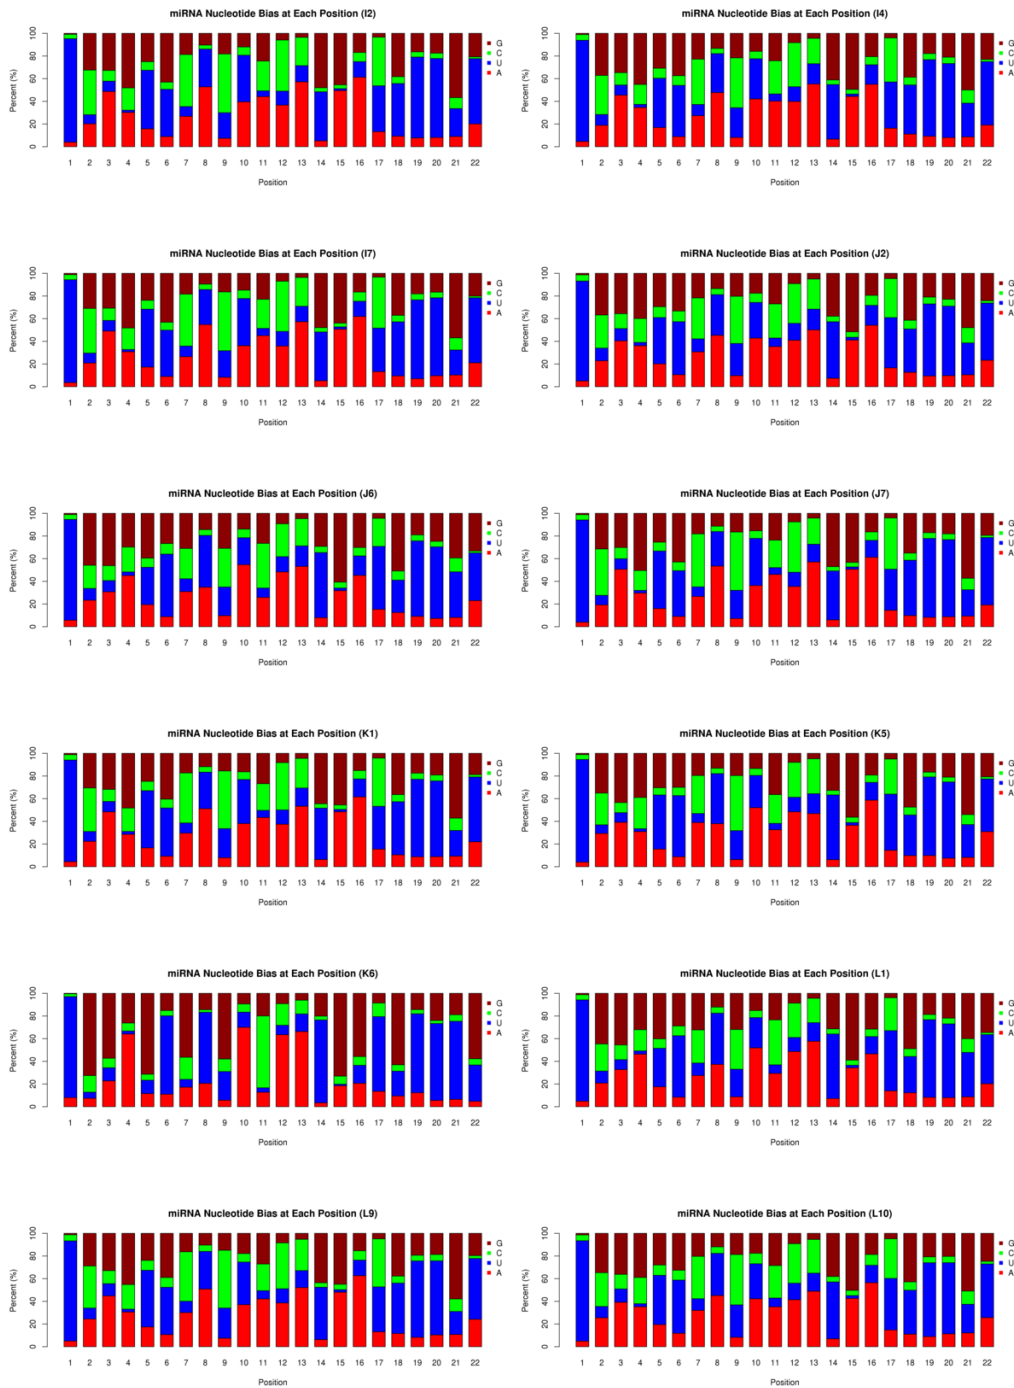

**Supplementary Figure 6.** Known miRNA base preference

The abscissa is the base position of the miRNA, and the ordinate is the percentage of bases A/U/C/G in the miRNA at this position.

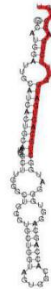

**Supplementary Figure 7.** Secondary structure of a partially predicted Novel miRNA.

The entire sequence is the miRNA precursor, and the red highlight is the mature sequence.

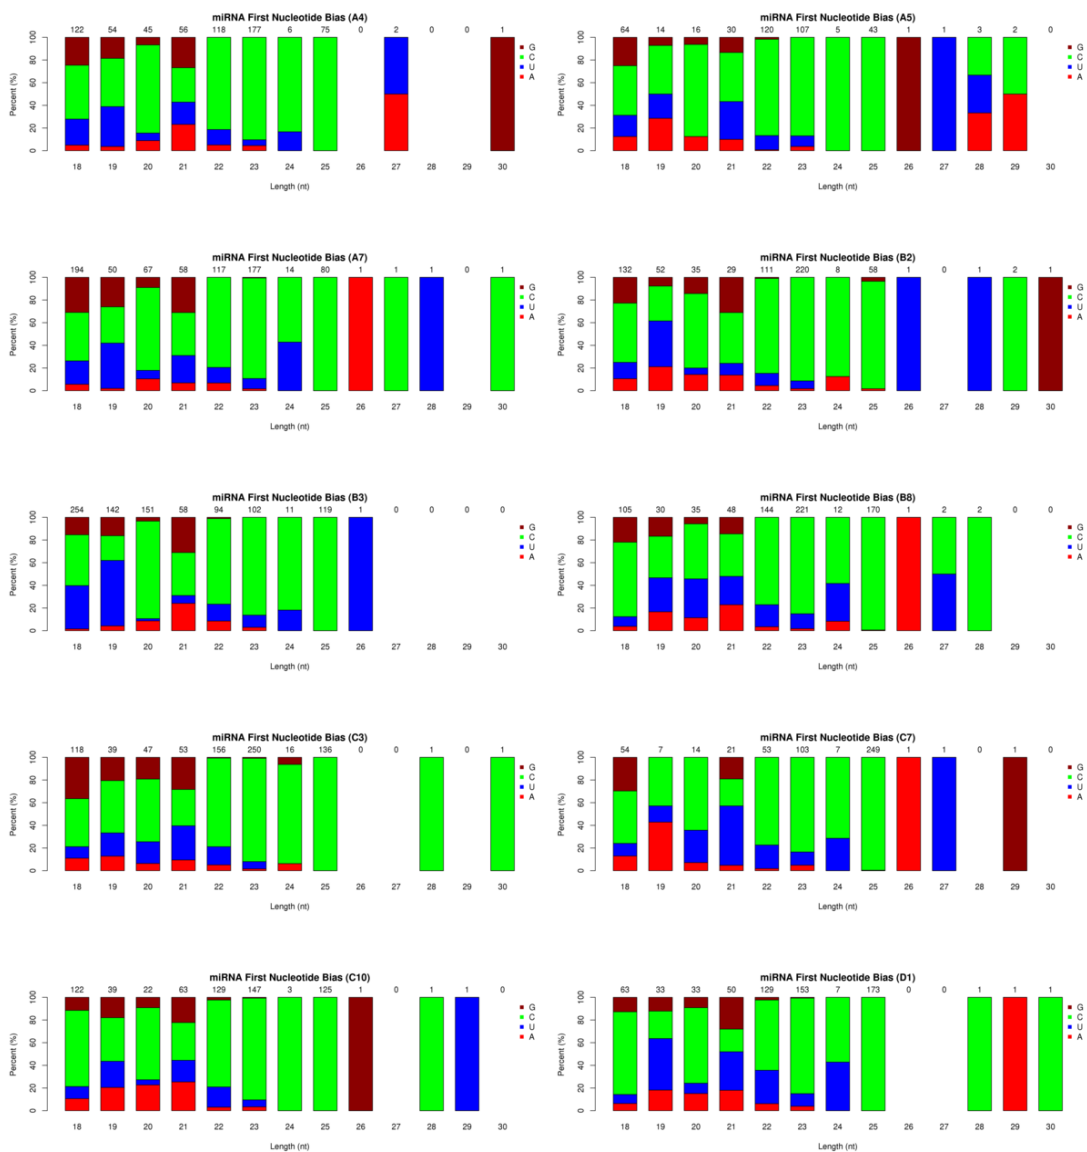

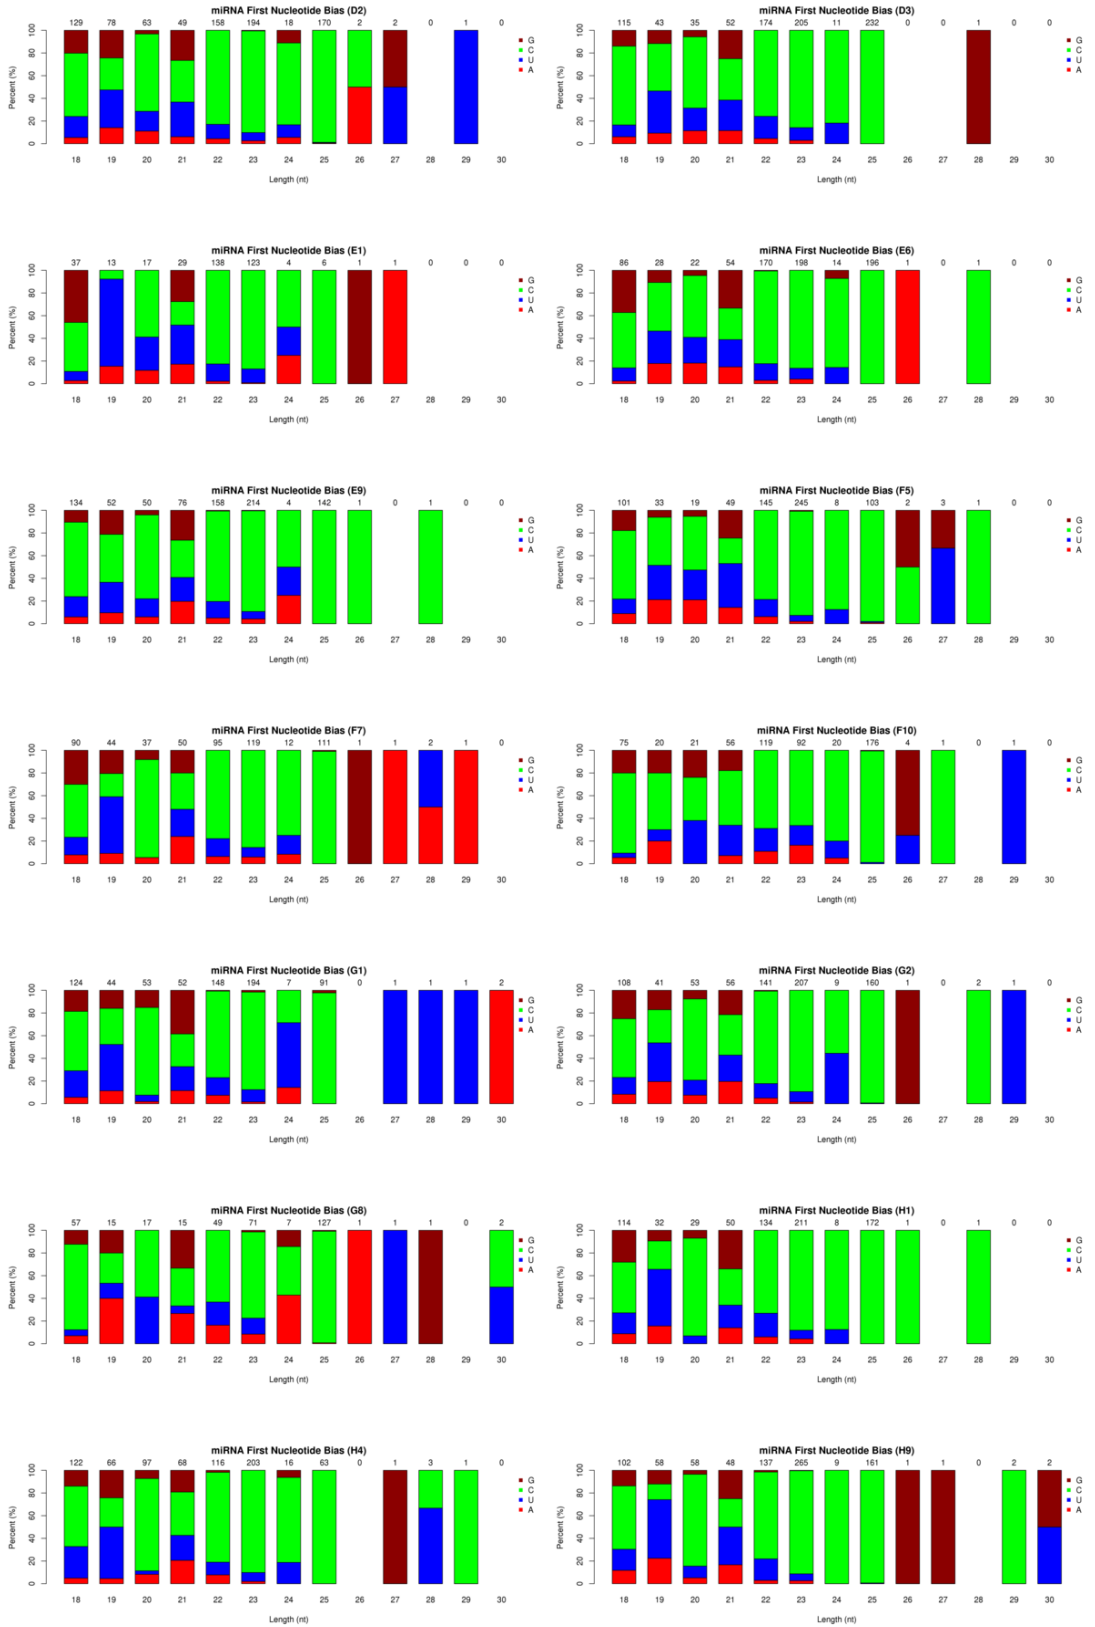

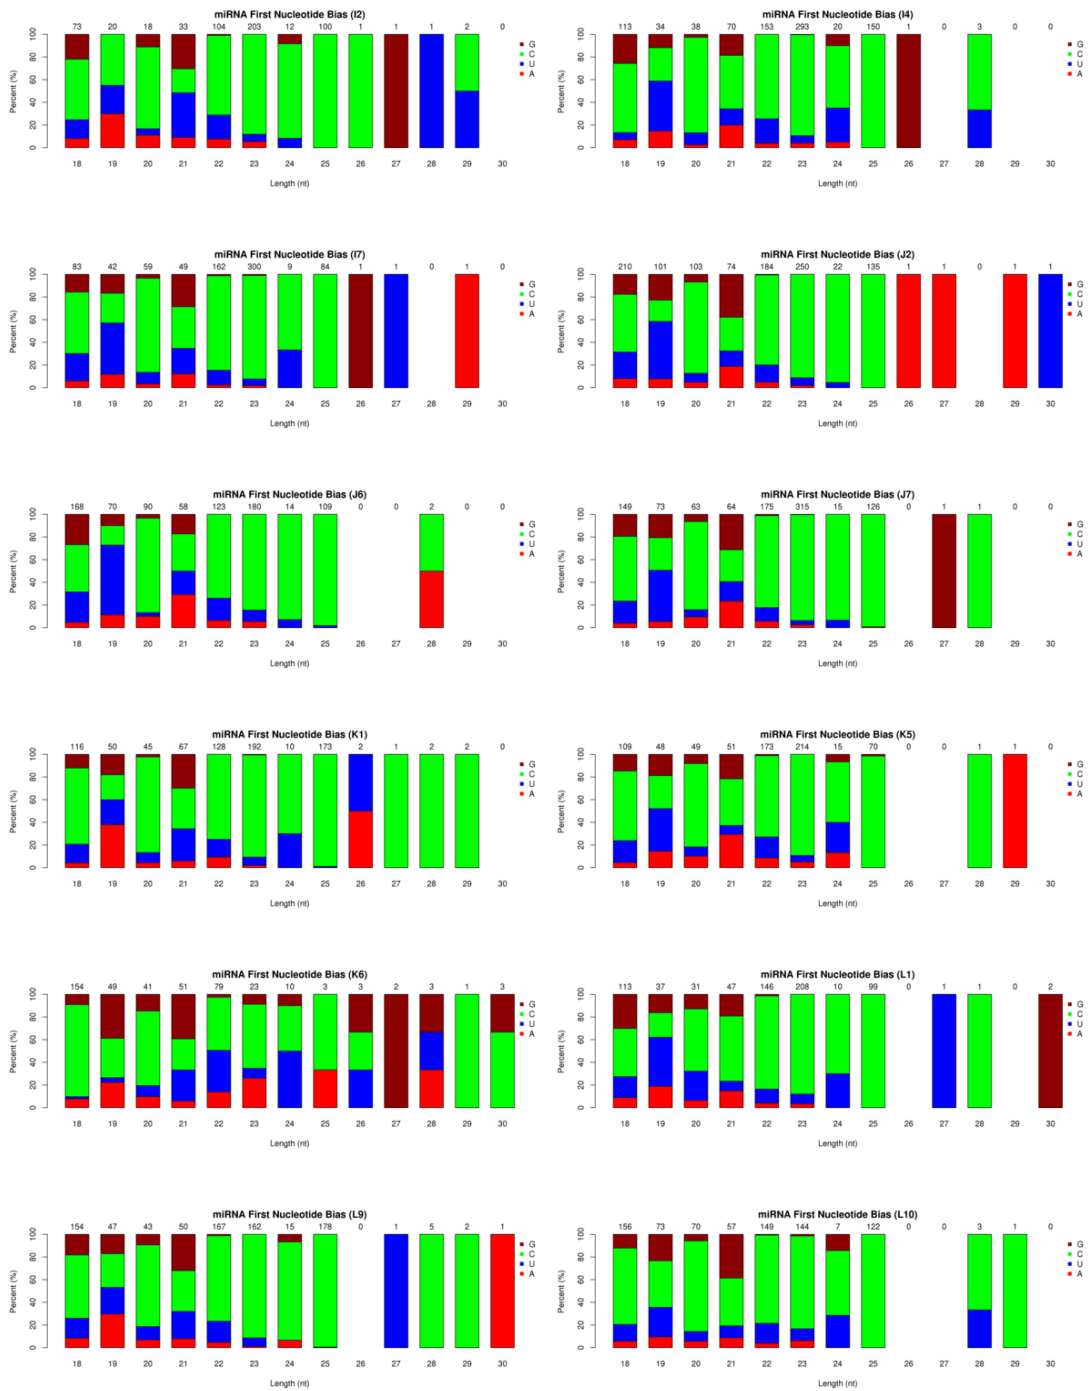

**Supplementary Figure 8.** First base preference of novel miRNAs with lengths from 18 to 30 nt.

The abscissa is the length of the miRNA, and the ordinate is the percentage of A/U/C/G in the first base of the length sRNA (the value above the bar graph is the total number of miRNAs of the length)

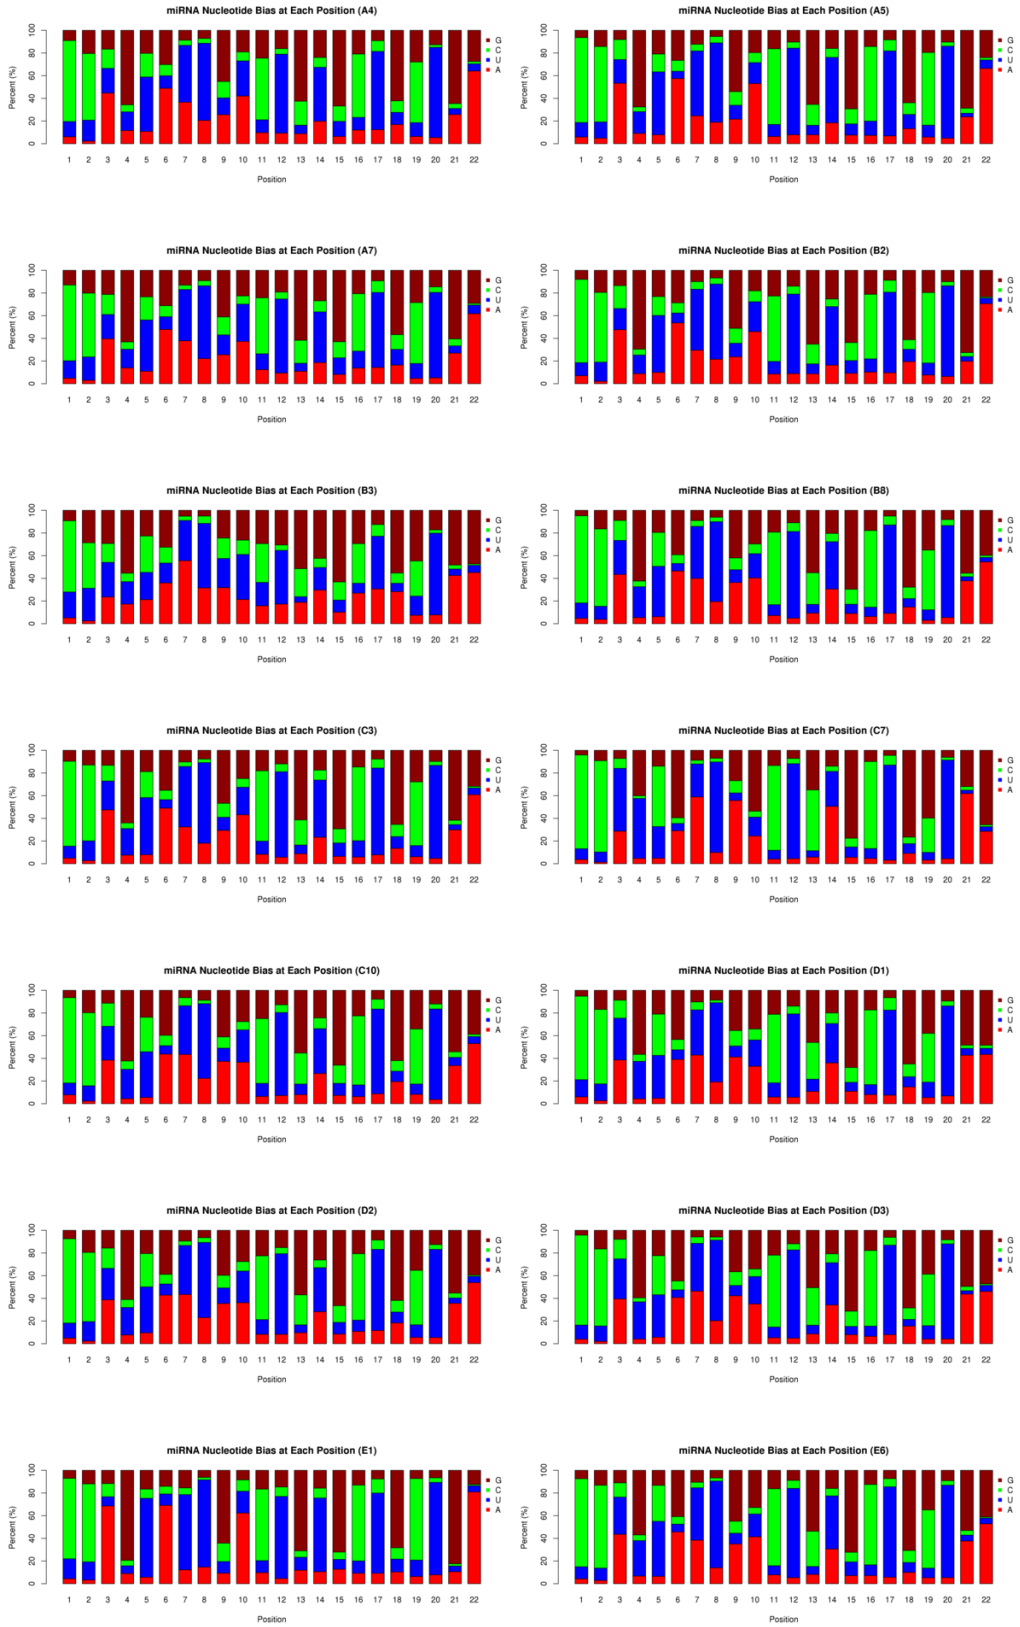



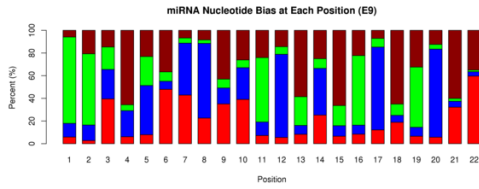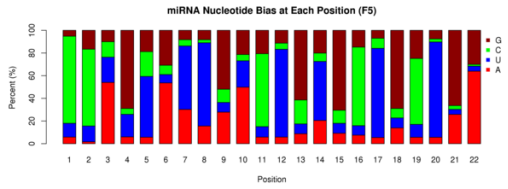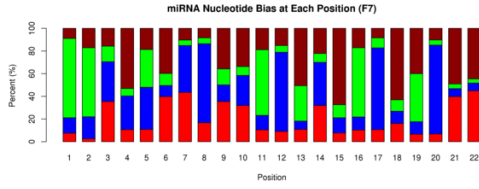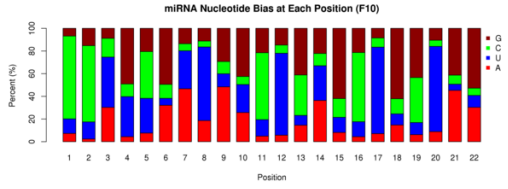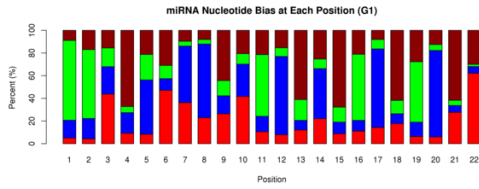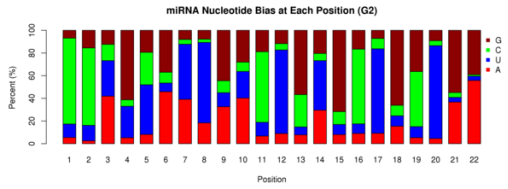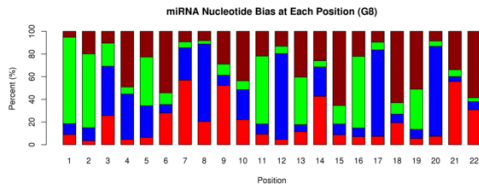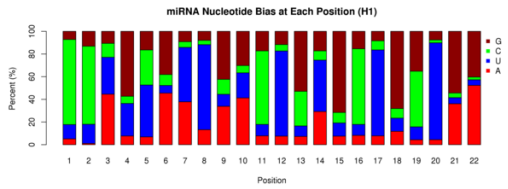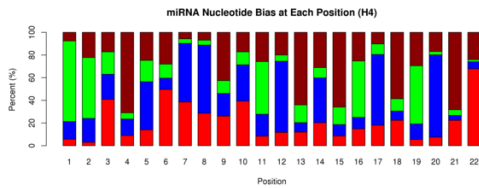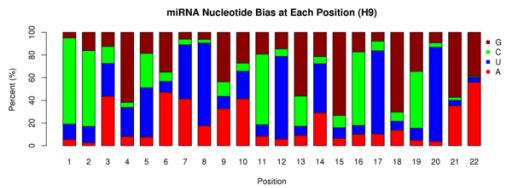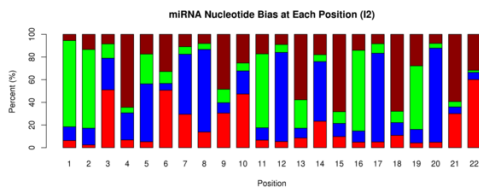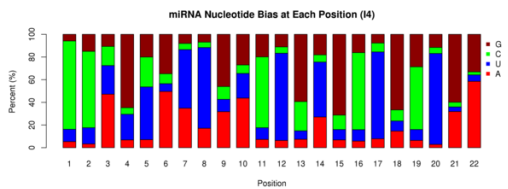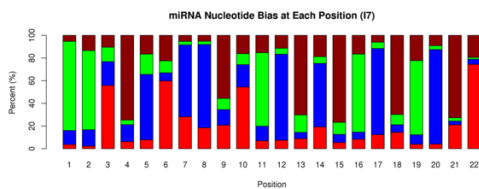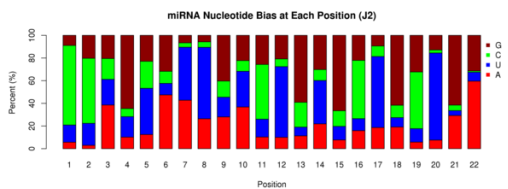

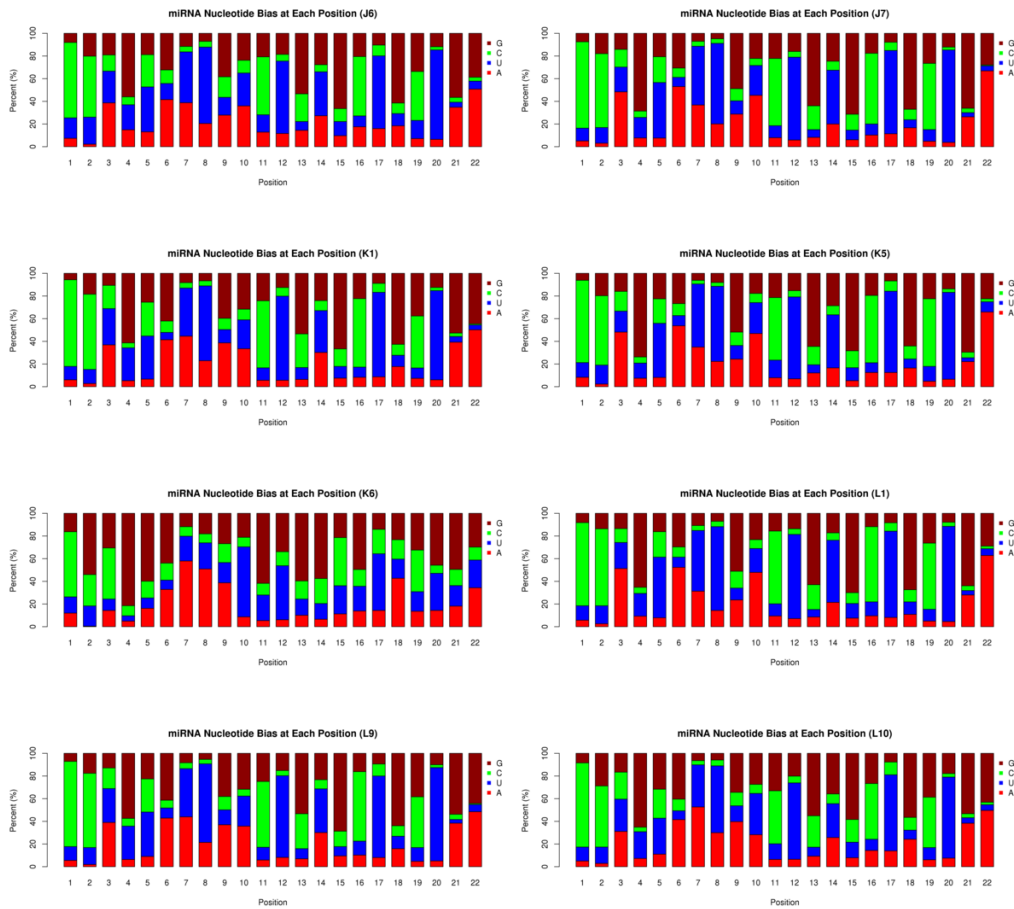

**Supplementary Figure 9.** Novel miRNA base preference.

The abscissa is the base position of the miRNA, and the ordinate is the percentage of bases A/U/C/G in the miRNA at this position

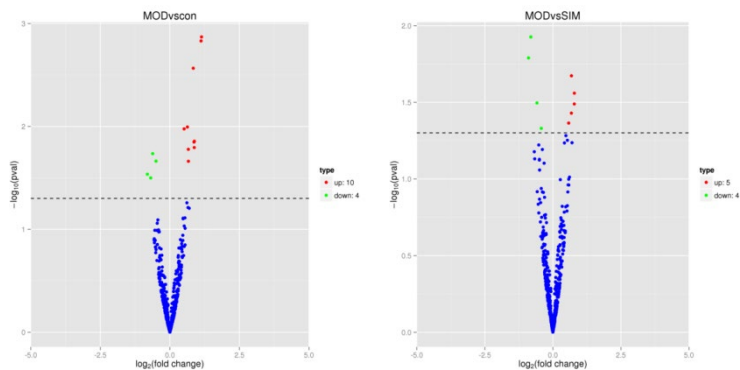

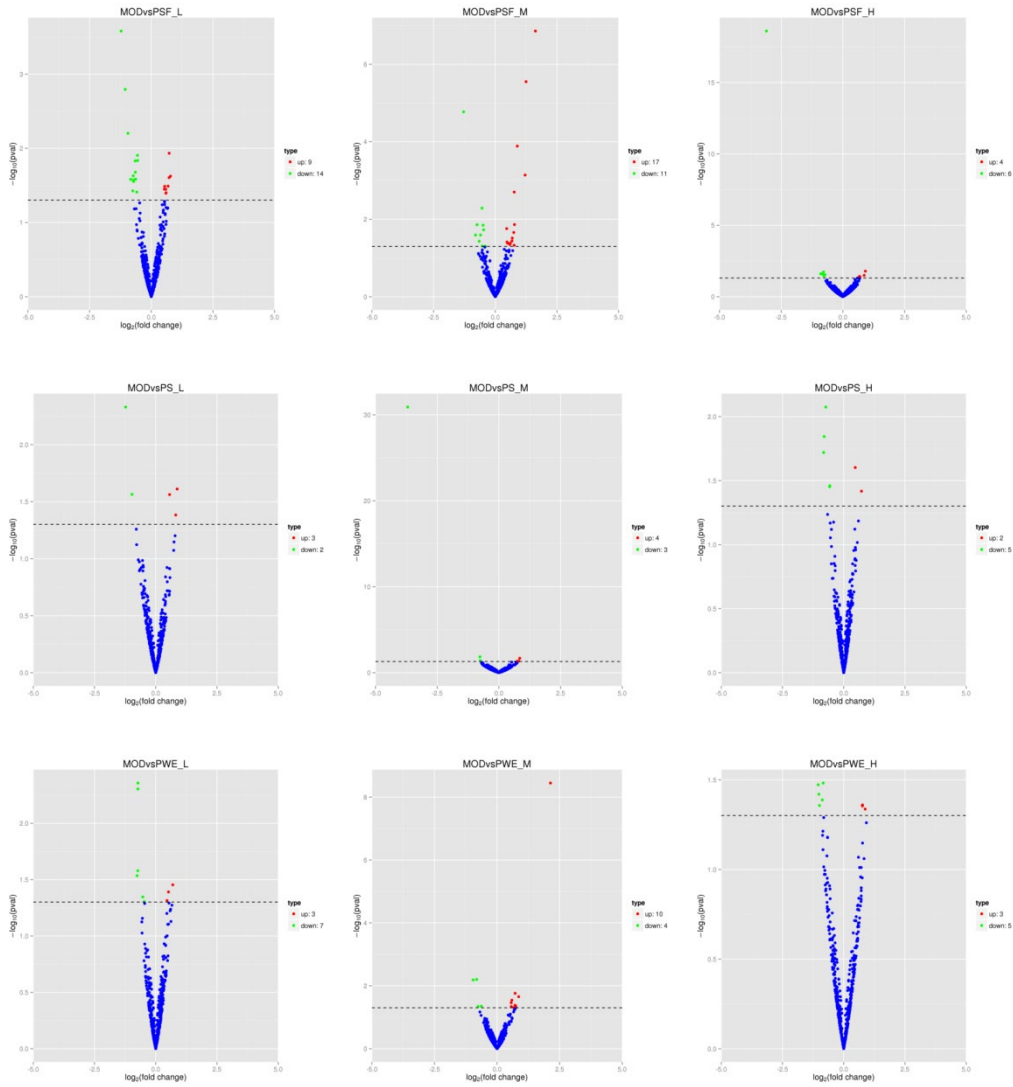

**Supplementary Figure 10.** Differential miRNA volcano map.

The abscissa represents the fold change in expression of miRNAs in different experimental groups/different samples, and the ordinate represents the statistical significance of the change in miRNA expression. The scatter points in the figure represent individual miRNAs, and the blue dots represent miRNAs with no significant differences. Red dots indicate significantly up-regulated differential miRNAs, and green dots indicate significantly down-regulated differential miRNAs

**a**

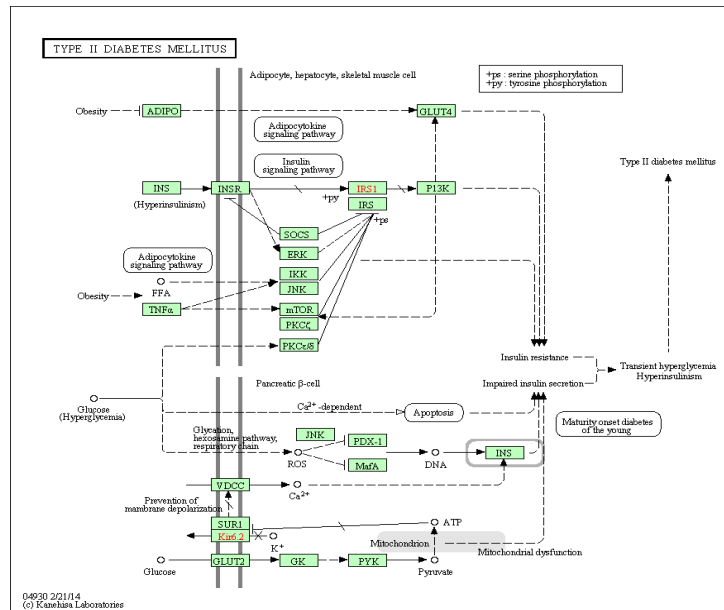

b

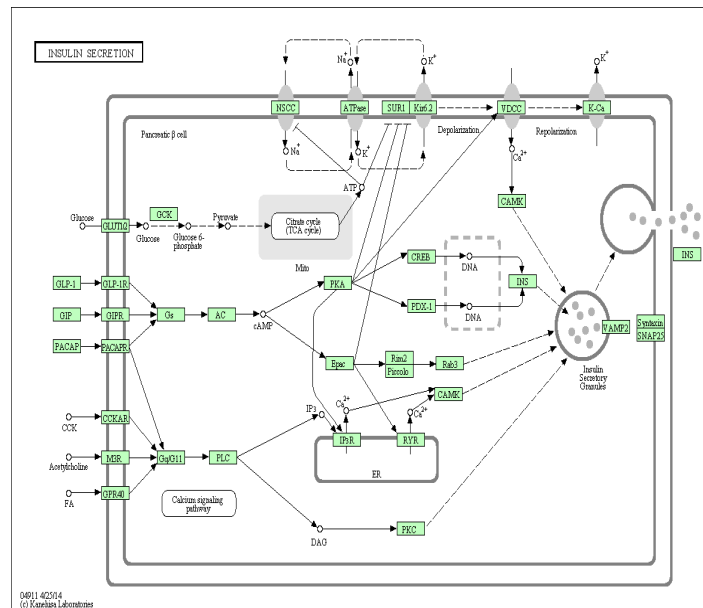

Supplement: Presentation1.pdf [file Presentation1.pdf]
